1 **Title:** Chromatin-immunoprecipitation reveals the PnP2 transcriptional network  
2 controlling effector-mediated virulence in a fungal pathogen of wheat.

3

4 **Running title**

5 PnP2 regulation of virulence

6

7 **Author names and affiliations:**

8 Evan John<sup>1,#,\*</sup>, Karam B. Singh<sup>1,2</sup>, Richard P. Oliver<sup>3</sup>, Jessica L. Soyer<sup>4</sup>, Jordi Muria-  
9 Gonzalez<sup>1</sup>, Daniel Soo<sup>1</sup>, Silke Jacques<sup>1</sup> and Kar-Chun Tan<sup>1,#</sup>

10 <sup>1</sup>Centre for Crop and Disease Management, Curtin University, Perth, Australia

11 <sup>2</sup>Agriculture and Food, Commonwealth Scientific and Industrial Research  
12 Organisation, Perth, Australia

13 <sup>3</sup>School of Biosciences, Nottingham University, Nottingham, United Kingdom

14 <sup>4</sup>Université Paris-Saclay, INRAE, UR BIOGER, 78850, Thiverval-Grignon, France

15

16 \*Current address:

17 Institute of Plant and Microbial Biology, Academia Sinica, Taipei 11529, Taiwan

18

19 #Please direct author inquiries to:

20 Evan John - [evan.john@curtin.edu.au](mailto:evan.john@curtin.edu.au)

21 Kar-Chun Tan – [Kar-Chun.Tan@curtin.edu.au](mailto:Kar-Chun.Tan@curtin.edu.au)

22

## 23 **Abstract**

24           The regulation of virulence in plant-pathogenic fungi has emerged as a key area  
25 of importance underlying host infections. Recent work has highlighted the role of  
26 transcription factors (TFs) that mediate the expression of virulence-associated genes.  
27 A prominent example is Pf2, a member of the Zn<sub>2</sub>Cys<sub>6</sub> family of fungal TFs, where  
28 orthologues regulate the expression of genes linked to parasitism in several plant-  
29 pathogen lineages. These include PnPf2 which controls effector-gene expression in  
30 *Parastagonospora nodorum*, thereby determining the outcome of effector-triggered  
31 susceptibility on its host, wheat. PnPf2 is a promising target for disease suppression  
32 but the genomic targets, or whether other are regulators involved, remain unknown.  
33 This study used chromatin immunoprecipitation (ChIP-seq) and a mutagenesis  
34 analysis to investigate these components. Two distinct binding motifs connected to  
35 positive gene-regulation were characterised and genes directly targeted by PnPf2  
36 were identified. These included genes encoding major effectors and other components  
37 associated with the *P. nodorum* pathogenic lifestyle, such as carbohydrate-active  
38 enzymes and nutrient assimilators. This supports a direct involvement of PnPf2 in  
39 coordinating virulence on wheat. Other TFs were also prominent PnPf2 targets,  
40 suggesting it also operates within a transcriptional network. Several TFs were  
41 therefore functionally investigated in connection to fungal virulence. Distinct metabolic  
42 and developmental roles were evident for the newly characterised PnPPro1, PnPAda1,  
43 PnPEbr1 and the carbon-catabolite repressor PnPCreA. Overall, the results uphold  
44 PnPf2 as the central transcriptional regulator orchestrating genes that contribute to  
45 virulence on wheat and provide mechanistic insight into how this occurs.

46

## 47 **Importance**

48 Fungal pathogens cause large crop losses worldwide and consequently much  
49 attention has focused on improving host genetic resistance to diseases. These  
50 pathogens use effectors, which require coordinated expression at specific stages of  
51 the pathogenic lifecycle, to manipulate the host plant metabolism in favour of infection.  
52 However, our understanding of the underlying regulatory network in coordination with  
53 other genes involved in fungal pathogenicity is lacking. The Pf2 TF orthologues are  
54 key players underpinning virulence and effector gene expression in several fungal  
55 phytopathogens, including *P. nodorum*. This study provided significant insight into the  
56 DNA-binding regulatory mechanisms of *P. nodorum* PnPf2, as well as further evidence  
57 that it is central to the coordination of virulence. In the context of crop protection, the  
58 Pf2 taxonomic orthologues present opportune targets in major fungal pathogens that  
59 can be perturbed to reduce the impact of effector triggered-susceptibility and improve  
60 disease resistance.

61

62

## 63 **Keywords**

64 Transcription factor, virulence, regulation, gene expression, orthologue

## 65 **Abbreviations**

66 Transcription factor (TF), DNA-binding domain (DBD), chromatin immunoprecipitation  
67 (ChIP), carbohydrate-active enzyme (CAZyme), amino acid (a.a), gene ontology (GO)

## 68 1. Background

69 The *Parastagonospora nodorum*-wheat interaction has become a model  
70 fungal-plant pathosystem to study the molecular virulence factors underpinning  
71 infection. The fungus produces small secreted effector proteins that selectively interact  
72 with host-receptors encoded by dominant susceptibility-genes (1, 2). These  
73 interactions occur in a gene-for-gene manner that causes 'effector-triggered  
74 susceptibility' in the host plant, quantitatively affecting the disease which manifests as  
75 septoria nodorum blotch. Several effectors acting in this manner have now been  
76 identified and characterised for their role in virulence (3–7). These studies have also  
77 described a consistent pattern: the expression of these genes is maximal two to four  
78 days after infection and then declines. Furthermore, expression levels can vary by the  
79 presence or absence of their matching wheat receptors, as well as by epistasis,  
80 whereby one effector gene causes suppression of another (8–10). Yet relatively little  
81 is known concerning the mechanisms governing the effector gene regulation. In  
82 particular, are there common or distinct regulatory pathways involved? Do these  
83 components specifically control effector gene expression, or co-regulate other  
84 metabolic and developmental pathways? New knowledge in this area could present  
85 suitable targets to suppress for disease control.

86

87 Many fungi possess a Zn<sub>2</sub>Cys<sub>6</sub> transcription factor (TF) Pf2 that has been  
88 associated with the regulation of effector gene expression. One example is the AbPf2  
89 orthologue in *Alternaria brassicicola* that is critical for virulence on *Brassica* spp. (11).  
90 Gene deletion of *AbPf2* resulted in the down-regulation of a number of effector like  
91 genes, as well as putative cell-wall degrading enzymes. In *P. nodorum*, at least two  
92 key effector genes, *ToxA* and *Tox3*, require PnPf2 to be expressed (12). An RNA-seq

93 analysis also revealed PnPf2 regulates many more putative effectors, CAZymes,  
94 hydrolases/peptidases and nutrient transporters (13). The PtrPf2 orthologue in  
95 *Pyrenophora tritici-repentis* controls *ToxA* expression and virulence on wheat, much  
96 like for the homologous *ToxA* gene in *P. nodorum* (12). In *Leptosphaeria maculans*,  
97 the causal agent of blackleg disease on *Brassica* spp., the LmPf2 orthologue also  
98 regulates several effector genes, including *AvrLm4-7*, *AvrLm6*,  
99 *AvrLm10A* and *AvrLm11*, as well as CAZyme expression (14).

100

101 The Pf2 orthologues can be traced across several Ascomycota fungal lineages  
102 that include the Dothideomycetes, Leotiomycetes and Soradiomycetes (15). Gene-  
103 deletion in the plant pathogens *Botrytis cinerea*, *Fusarium* spp., *Magnaporthe oryzae*  
104 and *Zymoseptoria tritici* all suppressed fungal virulence as well as their capacity to  
105 utilise alternative carbon sources (16–19). Analogous carbohydrate regulatory roles  
106 have been attributed in the saprophytic fungi *Neurospora crassa* and *Trichoderma*  
107 *reesei* (20, 21). In *N. crassa*, the putative orthologue Col-26 is a critical component  
108 within a signalling-network that responds to glucose availability and promotes the  
109 expression of CAZymes for plant cell-wall degradation (22–24). There is a strong  
110 association between CAZyme gene content and plant-pathogenic lifestyles (25).

111

112 There are some key factors yet to be established among Pf2 orthologues. Which  
113 DNA-regulatory elements are bound? Are Pf2-regulated genes directly targeted or is  
114 their expression modulated by indirect factors? Are there other TFs intimately  
115 connected with Pf2 regulation of virulence? The research presented here provides  
116 such critical insight for PnPf2 in *P. nodorum*, and establishes its direct role in effector  
117 expression and CAZyme regulation. A subsequent functional investigation of several

118 connected and directly targeted TFs provides further evidence for the central role held  
119 by PnPf2 in the transcriptional network that orchestrates virulence in *P. nodorum*.  
120

121     **2. Results**

122             **2.1. PnPf2 possesses typical Zn<sub>2</sub>Cys<sub>6</sub> TF domains and localises to the**  
123                     **nucleus.**

124             Conserved domains or distinguishing features were analysed in the 652 amino  
125     acid (a.a) PnPf2 protein. The Zn<sub>2</sub>Cys<sub>6</sub> DNA binding domain was located N-terminally  
126     at a.a 9 to 54 with an overlapping nuclear localisation signal (NLS) (KKGPKGSR; a.a  
127     51 to 58) (**Fig. 1A**). A ‘fungal TF domain’ was identified from a.a 223 to 294 within a  
128     conserved ‘middle homology region’ (a.a 104 to 320). These features are frequently  
129     observed in Zn<sub>2</sub>Cys<sub>6</sub> TFs and have been linked to the modulation of TF activity (26,  
130     27, 15). A structurally disordered domain, typically associated with post-translational  
131     modifications and intermolecular interactions (28), was also identified at the C-  
132     terminus of PnPf2. Together, these features suggested that PnPf2 possesses the  
133     typical functional domains underpinning DNA-binding Zn<sub>2</sub>Cys<sub>6</sub> TF activity (26). Nuclear  
134     localisation of the C-terminally tagged PnPf2-GFP fusion protein was also observed  
135     (**Fig. 1B**). Along with the functional domains identified, this supported DNA-binding  
136     regulatory activity by PnPf2.

137

138

**Fig. 1 HERE**

139

## 140           **2.2. Two direct PnPf2 target motifs are associated with gene-regulation**

141           A chromatin immunoprecipitation (ChIP) analysis was used to define PnPf2-  
142 DNA binding *in situ*. The *Pf2-HA* (native promoter) and *Pf2-HA\_OE* (overexpression  
143 promoter) strains expressing the 3x haemagglutinin (HA) tagged PnPf2-HA fusion  
144 protein retained PnPf2 function, in contrast to a *pf2-HA\_KO* deletion control (**Text S1**).  
145 A ChIP-seq analysis was therefore undertaken using the *Pf2-HA* and *Pf2-HA\_OE*  
146 strains to identify ‘summits’ within enriched ‘peak’ regions. Summits corresponded to  
147 the best estimate of PnPf2-DNA binding loci within the peaks (29). The *Pf2-HA* and  
148 *Pf2-HA\_OE* samples provided complementary datasets; the overexpression mutant to  
149 compensate for lower *PnPf2* expression under culture conditions (13, 30) and broaden  
150 the DNA interactions captured. A total of 997 summits were obtained from the *Pf2-HA*  
151 dataset and 2196 from *Pf2-HA\_OE*, corresponding to 740 and 1588 peak regions  
152 respectively. There were 588 shared peaks identified between the samples (**File S1**),  
153 indicating strong overlap between the predicted PnPf2-targeted regions. The *Pf2-*  
154 *HA\_OE* dataset broadened the scope of putative binding sites. A quantitative PCR  
155 (qPCR) analysis was then undertaken on independently prepared ChIP DNA,  
156 comparing the *Pf2-HA* and *Pf2-HA\_OE* samples to the *pf2-HA\_KO* control. Fold-  
157 enrichment values relative to *pf2-HA\_KO* strongly correlated with ChIP-seq summit -  
158  $\text{Log}_{10}(\text{Q-values})$ , a proxy measure for PnPf2-DNA binding affinity, in both the *Pf2-HA*  
159 ( $P < 0.01$  with Pearson’s  $r = 0.77$ ) and *Pf2-HA\_OE* ( $P < 0.01$  with Pearson’s  $r = 0.74$ )  
160 datasets (**Text S1**). The high reproducibility across separate methodologies provided  
161 confidence in the robustness of ChIP-seq summit calls.

162

163

**Text S1 HERE**

164



165

**File S1 HERE**

166

167 Previous RNA-seq differential-expression analyses had identified an enriched  
168 consensus motif (5'-WMGGVCCGAA-3') in the promoter regions of both AbPf2 and  
169 PnPf2-regulated genes (11, 13). Despite harbouring the typical 'CGG' Zn<sub>2</sub>Cys<sub>6</sub> binding  
170 triplet (26), an interaction with PnPf2 was not observed in a heterologous system,  
171 indicating regulatory cofactors may be required (31, 13). A search for DNA-regulatory  
172 elements that interact with PnPf2 from the ChIP-seq dataset identified two enriched  
173 motifs in the merged *Pf2-HA* and *Pf2-HA\_OE* peak regions (**Fig. 2A**). The first motif  
174 designated as M1 (5'-RWMGGVCCGA-3') closely matches the consensus motif from  
175 AbPf2 and PnPf2-regulated gene promoters (11, 13). The second motif designated as  
176 M2 (5'-CGGCSBBWYYKCGGC-3') is novel for PnPf2, encompassing two copies of  
177 the canonical 'CGG' Zn<sub>2</sub>Cys<sub>6</sub> binding triplets (26), separated by eight nucleotides.  
178 Interestingly, M2 matches the AmyR regulatory response element that was modelled  
179 in *A. nidulans* (32). Both M1 and M2 are close to the ChIP-seq summits for the *Pf2-*  
180 *HA* and *Pf2-HA\_OE* datasets (**Fig. 2B**), suggesting they accurately reflected DNA-  
181 binding loci.

182

183 The previous RNA-seq analysis had defined genes positively or negatively-  
184 regulated by PnPf2 from their expression changes in the *PnPf2*-deletion mutant *pf2ko*  
185 relative to wildtype SN15 (13). These gene sets include the *in vitro* culture conditions  
186 that were replicated here for ChIP to maximise TF-DNA yields, as well as an early  
187 fungal infection stage *in planta* (72 hrs). Instances of M1 and M2 were then identified  
188 across the promoters of the positive (i.e. *pf2ko*-down) and negative (*pf2ko*-up) PnPf2-  
189 regulated gene sets (**File S2**). Both M1 and M2 were significantly enriched in the

190 positively-regulated gene promoter set only (**Fig. 2A**). This indicates both motifs  
191 correspond to cis-regulatory elements that induce, rather than repress, gene  
192 expression.

193

194 A novel approach here sought to detect specifically the PnPf2-motif  
195 interactions. This utilised a *dTomato* reporter gene fused to the promoter of  
196 SNOG\_15417. The promoter was chosen to encompass a ChIP-seq peak region with  
197 both the M1 and M2 motifs for a gene that is positively-regulated by PnPf2 (**Fig. 2C**;  
198 **File S2**). Integration of the construct at a predefined genomic locus in the SN15  
199 background permitted evaluation of the reporter-gene expression in the resultant strain  
200 (*p15417\_M1M2*) in comparison with strains where the CGG triplets in M1 and/or M2  
201 had been substituted (*p15417\_m1M2*, *p15417\_M1m2* and *p15417\_m1m2*).  
202 Significantly reduced expression was observed in the strains where M1 had been  
203 mutated, indicating that it is a functionally important and direct PnPf2 target in the  
204 SNOG\_15417 promoter (**Fig. 2C**). No significant expression change was detected  
205 where only the M2 motif was mutated.

206

207

**Fig. 2 HERE**

208

209           **2.3. PnPf2 directly targets genes associated with the pathogenic**  
210                           **lifestyle of *P. nodorum***

211           Genes with a ChIP-seq summit in their promoter region, considered a putative  
212 PnPf2 target, were cross-referenced with the *pf2ko* RNA-seq data analysis (**File S2**).  
213 There were 1286 targets identified from either ChIP-seq dataset, 484 of which were  
214 considered ‘high-confidence’ with a promoter summit in both *Pf2-HA* and *Pf2-HA\_OE*  
215 (**Fig. 3A**). Of the 484 direct targets, 72 genes were positively-regulated in contrast to  
216 6 negatively-regulated genes under the same *in vitro* conditions used for ChIP-seq.  
217 This indicates PnPf2 functions mainly as a positive regulator of gene expression.  
218 When expanded to also encompass PnPf2-regulated genes *in planta*, 93 were  
219 positively while 27 were negatively-regulated genes (**Fig. 3B**). Differential expression  
220 was not detected in the *pf2ko* mutant for 364 genes. This suggests other regulatory  
221 factors play a considerable role in their expression.

222

223

**File S2 HERE**

224

225           The characterised effector genes present in *P. nodorum* SN15, *ToxA*, *Tox1*,  
226 *Tox3* and *Tox267* (7), plus 29 other effector-like genes whose expression was altered  
227 in the *pf2ko* mutant, were assessed for evidence of direct regulation by PnPf2. Two  
228 distinct ChIP-seq summits were identified in the bi-directional *Tox3* promoter (**Fig. S1**).  
229 Both the upstream gene (i.e. SNOG\_08982, encoding a protein disulphide-isomerase)  
230 and downstream gene (*Tox3*) are positively regulated by PnPf2. A ChIP-seq summit  
231 was also identified in the *Tox1* promoter, but only from the *Pf2-HA\_OE* dataset (**Fig.**  
232 **S1**). Unlike *Tox3*, *Tox1* necrosis-inducing activity is still detected in the *pf2ko*  
233 background (12), indicating the summit may represent a weak enhancer element. The

234 *ToxA* gene is only expressed during infection but in a PnPf2-dependent manner. A  
235 weak promoter summit was observed despite multiple instances of the M1 motif,  
236 suggesting another factor(s) is required to facilitate PnPf2-DNA binding that was  
237 absent under the ChIP-seq experimental conditions. No distinct PnPf2 summit was  
238 observed in the promoter of *Tox267*, whose expression is not significantly altered in  
239 the *pf2ko* mutant, although two instances of M1 were identified >1000 bp upstream  
240 (**Fig. S1**). In total, 11 of the 29 PnPf2-regulated effector-like genes showed evidence  
241 of direct PnPf2-promoter binding through ChIP-seq summits (**Table S1-A**).

242

243

**Fig. S1 HERE**

244

245 A gene-ontology (GO) enrichment and network analysis was then carried out  
246 to identify major functional gene classes that are directly regulated by PnPf2. Five  
247 distinct groups representing TFs, redox molecules, CAZymes, cell-signalling  
248 molecules and nutrient transporters were significantly enriched among the GO  
249 networks (**Fig. 3C-D**). The enrichment of CAZymes, redox molecules and nutrient  
250 transporters is consistent with enriched functional GO classes that were observed for  
251 the *pf2ko* differentially expressed genes (13). In contrast, the TFs and cell-signalling  
252 molecules were not enriched, indicating they could be tightly controlled by redundant  
253 pathways in addition to PnPf2. Nevertheless, it was striking that TF genes were  
254 particularly enriched in the high-confidence set of 484 targets (**Fig. 3C-D**). They made  
255 up 9.1% of these genes in contrast to 3.5% of the total genes annotated for SN15.  
256 Five TFs were directly targeted and positively regulated, providing a direct connection  
257 with PnPf2 in the regulation of virulence (**Table S1-B**).

258

259

**Fig. 3 HERE**

260

261

**Table S1 HERE**

262



288 observed an increased susceptibility to oxidative (H<sub>2</sub>O<sub>2</sub>) stress for *ada1\_KO* mutants  
289 similar to *pf2ko*. Furthermore, sporulation was reduced in *ada1\_KO* relative to SN15  
290 (**Fig. 4C-E**). The *ebr1\_KO* mutants exhibited vegetative growth defects with an uneven  
291 growth perimeter around the colony edges coinciding with perturbed virulence (**Fig.**  
292 **4A-B**). Similar hyphal-branching defects were described following deletion of *PnEbr1*  
293 orthologues in *Fusarium* spp. (33, 34). Interestingly, the *ebr1\_KO* mutants were also  
294 susceptible to H<sub>2</sub>O<sub>2</sub> stress at a level comparable to *pf2ko* and *ada1\_KO*. Furthermore,  
295 pycnidia were abnormally developed, although still viable for the production of conidia,  
296 but were not detected on infected leaves (**Fig. 4C-D**). We did not observe  
297 morphological or virulence defects for the *08237\_KO* or *08565\_KO* mutants (**Text S2**)  
298 which were not investigated in further detail.

299

300

**Fig. 4 HERE**

301

302 During the course of this study the carbon-catabolite repressor (CCR) element  
303 was modelled as the binding site for the Cre-1 TF that suppresses CAZyme expression  
304 in *N. crassa* (22). We noted this was near identical to a motif (5'-RTSYGGGGWA-3')  
305 that is also enriched in PnPf2-regulated gene promoters (13) but not identified from  
306 the ChIP-seq peaks. Since Cre-1 orthologues are conserved CCR regulators in  
307 filamentous fungi (35, 36), and since the CCR element is also enriched in PnPf2  
308 regulated gene promoters, a putative Cre-1 orthologue (PnCreA) was investigated in  
309 *P. nodorum* to identify common regulatory pathways with PnPf2. Both *PnCreA*  
310 overexpression and gene-deletion mutants (*CreA\_OE* and *creA\_KO*) were created  
311 and then investigated alongside *pf2ko* and a *PnPf2* overexpression mutant (*Pf2\_OE*).  
312 Despite clear phenotypic-growth abnormalities (**Fig. 5**), neither the *CreA\_OE* nor

313 *creA\_KO* mutants exhibited virulence defects on wheat leaves (**Text S2**). The  
314 *creA\_KO* strain was enhanced in starch utilisation (**Fig. 5**), an indicator substrate for  
315 CCR activity (37). In contrast, there was a moderate reduction of *pf2ko* to utilise starch,  
316 similar to observations in other fungal *PnPf2*-orthologue mutants (17, 19, 21). These  
317 results support contrasting roles between PnCreA and PnPf2 for the regulation of  
318 some CAZyme-related genes.

319

320

**Fig. 5 HERE**

321

322

**Text S2 HERE**

323

324

**Table 1 HERE**

325



### 326 3. Discussion

327 Prior to this research, PnPf2 had been identified as an important regulator of *P.*  
328 *nodorum* virulence on wheat (12, 13), but important details and mechanistic insights  
329 were missing. We sought to take further steps and establish the DNA-binding elements  
330 targeted by PnPf2 and identify genes that were directly under its direct regulation. Two  
331 distinct regulatory motifs M1 and M2 were identified and linked to positive gene-  
332 regulation by PnPf2. M1 was strikingly similar to an enriched sequence in AbPf2  
333 positively-regulated gene promoters (11), possibly representing a conserved Pf2  
334 binding mechanism. It will be pertinent to explore this motif as a regulatory target for  
335 other fungal Pf2 orthologues (11–14, 16–21). Interestingly, the M2 motif matches the  
336 extensively characterised AmyR regulatory-response element in *A. nidulans* (38, 32).  
337 Polysaccharide metabolism has long been established as a regulatory function for  
338 AmyR (39, 40). Therefore, some shared regulatory pathways likely exist with Pf2  
339 orthologues given the evidence for at least one conserved binding mechanism.  
340 However, there are major a.a polymorphisms between AmyR and Pf2 orthologues at  
341 the Zn<sub>2</sub>Cys<sub>6</sub> DNA-binding domain (15) and M1 has not been reported as an AmyR  
342 target despite extensive motif investigation (38, 32). It is therefore conceivable that M1  
343 is a regulatory binding element unique to Pf2 orthologues and therefore useful to  
344 identify putative direct targets such as *ToxA* in *P. nodorum*.

345

346 The ChIP-seq PnPf2-DNA binding dataset also facilitated the identification of  
347 *P. nodorum* genes under direct PnPf2 regulation. Among these genes is the *Tox3*  
348 effector and the adjacent gene, SNOG\_08982, encoding a protein disulphide  
349 isomerase. This class of protein catalyses cysteine-cysteine bond formation which has  
350 been connected to fungal effector protein production (41). Therefore, it would be worth

351 exploring any involvement of SNOG\_08982 in the post-translational modification of  
352 Tox3 and other effectors. PnPf2 binding was also detected in the *Tox1* promoter. A  
353 partial reduction in *Tox1* expression was reported in the *pf2ko* mutant (13), indicating  
354 PnPf2 is not essential but enhances expression under favourable conditions. *ToxA* is  
355 only expressed *in planta*, but is PnPf2 dependent (12). Despite multiple instances  
356 matching the M1 motif, there was little evidence for PnPf2-*ToxA* promoter binding,  
357 suggesting chromatin inaccessibility or the absence of essential binding-cofactors  
358 under the ChIP culture conditions. Direct PnPf2 regulation of *Tox267* was not evident.  
359 The other recently-cloned effector gene *Tox5* is not present in the SN15 isolate used  
360 in this study, but is homologous to *Tox3* may be under PnPf2 control (6). Nevertheless,  
361 several other effector-like genes were identified as direct PnPf2 targets (**Table S1-A**).  
362 Importantly this analysis provided strong evidence that PnPf2 is a key direct-regulator  
363 of effectors, the major *P. nodorum* virulence factors in the lifestyle of this pathogen.

364

365 Evidence for regulation of effector expression has been reported for another *P.*  
366 *nodorum* TF PnCon7 (42), yet its apparent requirement for fungal viability renders it  
367 difficult to investigate a precise functional role. Here, several novel TFs were  
368 functionally investigated based on their connection to PnPf2 (**Table 1**). We did not  
369 observe any change in the necrosis-inducing activity on wheat of fungal culture filtrates  
370 derived from the respective mutants. However, developmental virulence roles,  
371 including oxidative stress tolerance and hyphal development, were identified for *P.*  
372 *nodorum* PnAda1 and PnEbr1. It is possible that the direct regulation of PnAda1 by  
373 PnPf2 contributes to the susceptibility to oxidative stress also identified in the *pf2ko*  
374 mutant. The PnCreA orthologue of *N. crassa* Cre-1 was also investigated, following  
375 the striking observation that the *N. crassa* Cre-1 CCR element (5'-TSYGGGG-3') was

376 enriched in PnPf2-regulated gene promoters (13). Furthermore, Cre-1 and the PnPf2  
377 orthologue Col-26 are both key components of a transcriptional network controlling  
378 CAZyme production in *N. crassa* (22–24, 43). Here, the *creA\_KO* strain displayed an  
379 enhanced capacity to utilise starch, which was moderately impaired in the *pf2ko*  
380 mutant (**Fig. 5**). This indicates PnCreA and PnPf2 shared a similar function to the  
381 respective *N. crassa* orthologues (21). Surprisingly however, despite vegetative  
382 growth abnormalities on agar, there was no distinct change in the virulence profile of  
383 either the *creA\_KO* or *CreA\_OE* mutants (**Text S2**). We also failed to detect the CCR  
384 element in the promoters of *ToxA*, *Tox1*, *Tox3* or *Tox267* (**File S2**). This suggests that  
385 the regulation of host-specific virulence factors critical for *P. nodorum* infection are not  
386 subject to CCR by PnCreA.

387

388 This investigation, along with previous TF studies in *P. nodorum* (44, 45, 12,  
389 42), indicate PnPf2 is central to the transcriptional-regulatory network controlling  
390 virulence, for which a tentative model is proposed (**Fig. 6**). Having expanded our  
391 understanding, it also raised some key questions. For many genes directly targeted  
392 by PnPf2, differential expression in *pf2ko* has not been observed (364 of 484 high-  
393 confidence targets). Such discrepancies are also reported in ChIP-seq experiments  
394 on filamentous fungi (**Table S2**). One aspect to consider is that functional TF binding  
395 requires specific cofactors/coregulators before gene expression is eventually  
396 modulated (46, 47). Furthermore, TF-DNA interactions can be redundant or non-  
397 functional (48–50). It is therefore plausible that many binding sites are transiently  
398 occupied by PnPf2 in this manner, acting as a biological sink. A change in the  
399 epigenetic landscape, for example during growth *in planta*, could open up genomic  
400 regions for which PnPf2 exhibits a high affinity and then actively binds. Performing

401 PnPf2 ChIP during early infection will likely prove highly useful in this regard if sufficient  
402 fungal material can be obtained. ChIP-seq targeting histone marks specific for  
403 euchromatin or heterochromatin under infection conditions, or methylation-sensitive  
404 sequencing are alternatives to provide insight into the genome accessibility of PnPf2  
405 (14, 51–53). The identification of both the M1 and M2 motifs carrying alternatively  
406 oriented ‘CGG’ triplets, typical of Zn<sub>2</sub>Cys<sub>6</sub> monomers (26), was suggestive of PnPf2  
407 dimerisation with other Zn<sub>2</sub>Cys<sub>6</sub> TFs. However, deletion of the putative ancestral PnPf2  
408 homologue SNOG\_08565 did not provide any phenotypic response that would  
409 indicate a connection. Therefore, future investigations will do well to explore these  
410 interactions, for example through co-immunoprecipitation/affinity purification analysis  
411 or a yeast-2-hybrid screen, to delineate PnPf2-DNA binding mechanisms. Functional  
412 investigation of the PnPf2 ‘middle homology region’ and C-terminal disordered region  
413 may also provide insight into the upstream signalling pathways that activate or repress  
414 PnPf2 activity through these domains.

415

416 To conclude, this study presents direct evidence of DNA binding in a Pf2  
417 orthologue, where virulence-regulatory functions are consistently observed in  
418 phytopathogenic fungi. In *P. nodorum*, PnPf2 is central to the transcriptional regulation  
419 of virulence and directly controls effector expression. The current research on PnPf2  
420 now provides a platform to further investigate its signalling pathways and molecular  
421 interactions that could be inhibited for targeted disease control.

422

423

**Fig. 6 HERE**

424

425

**Table S2 HERE**

## 426 **4. Materials and methods**

### 427 **4.1. Annotations and PnPf2 domain analysis**

428 The *P. nodorum* annotated genome for the reference isolate SN15 (54) was  
429 used consistent with annotations in the previous RNA-seq analysis (13). The PnPf2  
430 polypeptide sequence was submitted to Interproscan (Release 82.0) for Interpro and  
431 Conserved-Domain-Database domain identification (55). NLStradamus was used to  
432 predict the nuclear localisation signal (56). The disordered region was predicted using  
433 IUPRED2A (28).

434

### 435 **4.2. Generation and assessment of fungal mutants**

436 The molecular cloning stages, the constructs generated and diagrammatic  
437 overview of the final transformed *P. nodorum* mutants generated in this study are  
438 detailed in **Text S3**. The respective primers designed for fragment amplification and/or  
439 screening are outlined in **File S3**. Fungal mutants used in this study are summarised  
440 in **Table 2**. Their phenotypic and gene-expression analysis procedures are also  
441 described in **Text S3**.

442

443 **Table 2. HERE**

444

445 **Text S3 HERE**

446

447 **File S3 HERE**

448

449           **4.3. Chromatin immunoprecipitation sample preparation**

450           The *Pf2-HA*, *Pf2-HA\_OE* and *pf2-HA\_KO* strains were prepared following 3  
451 days standardised growth in 100 mL Fries3 liquid medium (**Text S3**). Prior to  
452 harvesting, a 5 mL crosslinking solution (10% w/v formaldehyde, 20 mM EDTA and 2  
453 mM PMSF dissolved in 50 mM NaOH) was added with continuous shaking at 100 rpm  
454 for 10 min. To this, 5 mL quenching solution (1.25 M glycine) was added before  
455 another 10 min shaking. Whole protein extracts were then obtained as described (**Text**  
456 **S3**) with modifications for ChIP. The 50 mM Tris was replaced with 50 mM HEPES in  
457 the lysis buffer while gentle rotation of the resuspended fungal material was replaced  
458 by eight rounds of sonication using a Bandelin (Berlin, Germany)  
459 UW3100+SH70+MS73 tip sonicator to fragment the fungal DNA (set at 15 sec on/off  
460 with 60% amp and 0.8 duty cycle). Samples were held in an ice block during  
461 sonication. The supernatant was then retrieved from two rounds of centrifugation  
462 (5000 g, 4 °C for 5 min). A 100 µL aliquot of the supernatant was reserved as an 'input  
463 control' against which ChIP samples were to be normalised. A 1000 µL aliquot was  
464 then precleared for immunoprecipitation by gently rotating with 20 µL Protein A  
465 dynabeads (10001D - Thermofisher, Waltham, Massachusetts) for 1 hr at 4 °C. The  
466 supernatant was then retrieved and incubated with 2.5 µg anti-HA polyclonal antibody  
467 (71-5500 - Thermofisher) for 16 hrs at 4 °C. Another 20 µL Protein A dynabeads were  
468 then added and gently rotated for 2 hrs at 4 °C. The dynabeads were then retrieved  
469 and washed twice with 1mL ice-cold lysis buffer, once with high-salt buffer (lysis buffer  
470 + 500 mM NaCl), once with LiCl buffer (250 mM LiCl, 10 mM Tris-HCl, 1 mM EDTA,  
471 0.5% NP40 and 0.5% NaDOC) and once with TE buffer (10 mM Tris-HCl, 1 mM EDTA,  
472 pH 8). Samples were then incubated in a shaking incubator for 10 min (300 rpm, 65  
473 °C) with 200 µL elution buffer (0.1 M NaHCO<sub>3</sub>, 10 mM EDTA and 1% SDS) before

474 transferring the supernatant to a fresh tube. The input control was also supplemented  
475 with 100 $\mu$ L elution buffer at this stage and 8  $\mu$ L NaCl solution (5 M) was added to both  
476 samples before de-crosslinking for 16 hrs at 65 °C. To these samples, 200  $\mu$ L of H<sub>2</sub>O  
477 and 100  $\mu$ g RNase A (QIAGEN, Hilden, Germany) were added before incubating for  
478 1 hr at 65 °C. Ten  $\mu$ g Proteinase K (Sigma-Aldrich, St. Louis, Missouri) was then added  
479 before incubating a further 1 hr at 50 °C.

480

481 For ChIP-qPCR, DNA (for both the *Pf2-HA*, *Pf2-HA\_OE* and *pf2-HA\_KO* ChIP  
482 and input control samples) was recovered from Proteinase K treated samples using  
483 the GenElute PCR purification kit (Sigma-Aldrich).

484

485 For ChIP-seq analysis, DNA (for both *Pf2-HA* and *Pf2-HA\_OE* ChIP and input  
486 control samples) was purified from the Proteinase K treated samples by mixing in 1  
487 volume (400  $\mu$ L) of phenol:chloroform. This was centrifuged for 5 min at 16000 g and  
488 the aqueous phase retrieved. To this, 400 $\mu$ L chloroform was added, mixed and spun  
489 (16000 g 5 min) before 350  $\mu$ L of the aqueous phase was transferred to a fresh tube.  
490 35  $\mu$ L sodium acetate (3 M, pH 5.2) was added with 1  $\mu$ L of glycogen (20mg/mL).  
491 Samples were mixed by inversion and 1 mL 100% ethanol added before precipitation  
492 at -80 °C for 1-2 hrs. Pellets were retrieved by spinning 16000 g for 10 min at 4 °C,  
493 then washed in 1 ml of ice-cold 70% ethanol before drying and resuspension in 30  $\mu$ L  
494 Tris-Cl (10 mM).

495

496 Two independent DNA preparations for each sample (i.e. the ChIP and input  
497 samples for both *Pf2-HA* and *Pf2-HA\_OE*), beginning with the fungal growth stage in  
498 Fries3 broth, were pooled to ensure sufficient DNA was obtained for generating ChIP-

499 seq libraries. The pooled DNA was measured using a TapeStation system (Agilent,  
500 Santa Clara, California). 10 ng of each sample was processed using the TruSeq ChIP  
501 Library Preparation Kit (Illumina, San Diego, California). Libraries were size-selected  
502 (100-300 bp) and split across four separate lanes for sequencing in a NextSeq 500  
503 sequencer (Illumina) to obtain 2 x 75 bp paired-end reads (Australian Genome  
504 Research Facility, Melbourne, Australia).

505

#### 506 **4.4. ChIP-seq analysis**

507 An overview of the following data analysis pipeline from QC of raw reads  
508 through to genome mapping, ChIP-seq peak/summit calling, target gene prediction,  
509 ChIP-qPCR validation, GO enrichment analysis and motif position-weight-matrix  
510 (PWM) modelling **Text S1**.

511

##### 512 **4.4.1. Raw read filtering, mapping and peak/summit calling**

513 Raw reads were checked using FASTQC (Version 0.11.9) (57) and the adapter  
514 sequences were trimmed using Cutadapt (Version 1.15) along with nucleotides where  
515 the Illumina quality scores were below 30 (58). Optical duplicates were then removed  
516 using the 'dedupe' option in Clumpify (version 1.15) from the BBTools package (59).  
517 Reads were subsequently mapped to the SN15 genome (54) using BWA-MEM (60).  
518 Reads mapping to a single locus as the best match (primary alignments) were retained  
519 for downstream analysis and the datasets from sample libraries originally split across  
520 the NextSeq lanes were merged using SAMtools (Version 1.10) to produce the final  
521 mapped-read datasets (61). MACS (Version 2.2.7.1) was used for calling enriched  
522 regions (i.e. peaks) and summits (highest nucleotide point or points within peak  
523 regions) from ChIP sample reads relative to the input samples (for *Pf2-HA* and *Pf2-*



524 *HA\_OE*). A Q-value peak enrichment threshold of 0.01 was used and the BAMPE  
525 option utilised to assess read depth from cognate pairs (62, 63). Paired read lengths  
526 from the cognate pairs were assessed using Deeptools 'bamPEFragmentSize'  
527 (Version 3.3.0) to verify they corresponded to 100-300 bp size selected fragments  
528 (64).

529

#### 530 **4.4.2. Modelling binding-site motifs**

531 The overlapping peak regions identified from the *Pf2-HA* and *Pf2-HA\_OE*  
532 samples were merged using MAnorm (65) to create a consensus set of enriched peak  
533 regions containing the putative PnPf2 binding sites. From this set, overrepresented  
534 PWMs up to 20 bp long were modelled with MEME (version 5.1.1) (66, 67). For the  
535 resulting PWMs, 500 bp genomic regions centred at ChIP-seq summits were extracted  
536 and analysed using CentriMo (Version 5.1.1) to verify that the motif instances were  
537 also centred at the respective summits for both the *Pf2-HA* and *Pf2-HA\_OE* samples  
538 (68). Gene promoters (spanning annotated transcription start sites to the nearest  
539 upstream gene feature or 1500 bp) with  $\geq 1$  occurrence of each motif were determined  
540 using FIMO (69). These were cross-referenced with the differentially expressed genes  
541 (i.e. expressed significantly up or down in *pf2ko* relative to SN15) defined in a previous  
542 RNA-seq analysis (13). Fisher's exact test with Bonferroni corrected P-values (70) was  
543 used to identify *pf2ko* differentially expressed gene-promoter sets significantly  
544 enriched ( $P_{\text{adj}} < 0.01$ ) for the respective motifs vs the background rate in SN15.

545

#### 546 **4.4.3. PnPf2 target gene-promoter analysis**

547 Genes targeted by PnPf2 were determined based on the proximity of summits  
548 to annotated genes, which were identified using ChIPseeker (Version 1.24.0) (71).

549 Genes with  $\geq 1$  summit falling within their promoter region from the *Pf2-HA* or *Pf2-*  
550 *HA\_OE* datasets were considered PnPf2 targets. High-confidence PnPf2 targets  
551 corresponded to genes with a promoter summit in *Pf2-HA* and *Pf2-HA\_OE*. ChIP-  
552 qPCR was then undertaken to verify that the ChIP-seq peak regions in *Pf2-HA* and  
553 *Pf2-HA\_OE* would also correlate with quantitative enrichment against the *pf2-HA\_KO*  
554 control strain. Quantitative PCR primer pairs (**File S3**) were designed to flank ChIP-  
555 seq summits in a selection of gene promoters (*ToxA*, *Tox1*, *Tox3*, SNOG\_03901,  
556 SNOG\_04486, SNOG\_12958, SNOG\_15417, SNOG\_15429, SNOG\_16438,  
557 SNOG\_20100 and SNOG\_30077) and a selection of non-summit control regions (*Act1*  
558 and SNOG\_15429 coding sequences and the TrpC terminator). The 'input %' values  
559 were calculated for each sample using the method described previously (72) and used  
560 to calculate fold-differences (normalised to *Act1*) for *Pf2-HA* and *Pf2-HA\_OE* relative  
561 to the *pf2-HA\_KO* control for comparison with the *Pf2-HA* and *Pf2-HA\_OE*  $-\text{Log}_{10}(\text{Q-}$   
562 values) at the respective ChIP-seq summit loci. Pearson's correlation coefficient was  
563 calculated for the ChIP-qPCR fold-difference and ChIP-seq  $-\text{Log}_{10}(\text{Q-values})$  at the  
564 respective loci and used as the test statistic to assess whether the association was  
565 significant (SPSS version 27.0).

566

567 The PnPf2 target genes were cross-referenced with the *pf2ko* expression  
568 patterns (expressed significantly up or down in *pf2ko*) defined previously (13) to link  
569 direct binding with the modulation of gene expression. The SN15 effector-like genes  
570 annotated previously (13) were compiled among the PnPf2 targets. Annotated  
571 homologues were identified from the corresponding records in UniProt (release  
572 2020\_05) (73). Both the high-confidence and total PnPf2 target-gene sets were then  
573 used for GO enrichment/network analysis using the SN15 GO annotations defined

574 previously (13). The ‘enricher’ function in the ClusterProfiler package (Version 3.16.0)  
575 (74) was invoked to identify the overrepresented GO classes ( $P < 0.01$ ) in PnPf2  
576 targets.

577

#### 578 **4.5. Data availability statement**

579 The ChIP-seq reads are available under BioProject ID: PRJNA824526,  
580 corresponding to BioSamples SAMN27406642 (*Pf2-HA* strain) and SAMN27406643  
581 (*Pf2-HA\_OE* strain).

582

#### 583 **5. Acknowledgements**

584 This study was supported by the Centre for Crop and Disease Management, a joint  
585 initiative of Curtin University (<https://www.curtin.edu.au/>) and the Grains Research and  
586 Development Corporation (<https://grdc.com.au/>) under the research grant CUR00023  
587 Project F3 awarded to KCT). EJ was supported by an Australian Government  
588 Research Training Program Scholarship (<https://www.dese.gov.au/>) administered  
589 through Curtin University (<https://www.curtin.edu.au/>). The funders had no role in  
590 study design, data collection and interpretation, or the decision to submit the work for  
591 publication.

592

593 We would like to acknowledge Dr. Carl Mousley for helpful suggestions relevant to  
594 ChIP-seq motif validation, Dr. Darcy Jones for bioinformatics advice and support, as  
595 well as Johannes Debbler for assistance with molecular cloning.

## 596 6. References

- 597 1. McDonald MC, Solomon PS. 2018. Just the surface: advances in the discovery and  
598 characterization of necrotrophic wheat effectors. *Current Opinion in Microbiology*  
599 46:14–18.
- 600 2. Kanyuka K, Igna AA, Solomon PS, Oliver RP. 2022. The rise of necrotrophic effectors.  
601 *New Phytologist* 233:11–14.
- 602 3. Friesen TL, Stukenbrock EH, Liu Z, Meinhardt S, Ling H, Faris JD, Rasmussen JB,  
603 Solomon PS, McDonald BA, Oliver RP. 2006. Emergence of a new disease as a result  
604 of interspecific virulence gene transfer. *Nature Genetics* 38:953–956.
- 605 4. Liu Z, Faris JD, Oliver RP, Tan K-C, Solomon PS, McDonald MC, McDonald BA, Nunez  
606 A, Lu S, Rasmussen JB, Friesen TL. 2009. SnTox3 acts in effector triggered  
607 susceptibility to induce disease on wheat carrying the *Snn3* gene. *PLOS Pathogens*  
608 5:e1000581.
- 609 5. Liu Z, Zhang Z, Faris JD, Oliver RP, Syme R, McDonald MC, McDonald BA, Solomon  
610 PS, Lu S, Shelver WL, Xu S, Friesen TL. 2012. The cysteine rich necrotrophic effector  
611 SnTox1 produced by *Stagonospora nodorum* triggers susceptibility of wheat lines  
612 harboring *Snn1*. *PLOS Pathogens* 8:e1002467.
- 613 6. Kariyawasam GK, Richards JK, Wyatt NA, Running KLD, Xu SS, Liu Z, Borowicz P,  
614 Faris JD, Friesen TL. 2022. The *Parastagonospora nodorum* necrotrophic effector  
615 SnTox5 targets the wheat gene *Snn5* and facilitates entry into the leaf mesophyll. *New*  
616 *Phytologist* 233:409–426.
- 617 7. Richards JK, Kariyawasam GK, Seneviratne S, Wyatt NA, Xu SS, Liu Z, Faris JD,  
618 Friesen TL. 2022. A triple threat: the *Parastagonospora nodorum* SnTox267 effector  
619 exploits three distinct host genetic factors to cause disease in wheat. *New Phytologist*  
620 233:427–442.

- 621 8. Phan HTT, Rybak K, Furuki E, Breen S, Solomon PS, Oliver RP, Tan K-C. 2016.  
622 Differential effector gene expression underpins epistasis in a plant fungal disease. *The*  
623 *Plant J* 87:343–354.
- 624 9. Peters-Haugrud AR, Zhang Z, Richards JK, Friesen TL, Faris JD. 2019. Genetics of  
625 variable disease expression conferred by inverse gene-for-gene interactions in the  
626 wheat-*Parastagonospora nodorum* pathosystem. *Plant Physiology* 180:420–434.
- 627 10. John E, Jacques S, Phan HTT, Liu L, Pereira D, Croll D, Singh KB, Oliver RP, Tan K-C.  
628 2022. Variability in an effector gene promoter of a necrotrophic fungal pathogen  
629 dictates epistasis and effector-triggered susceptibility in wheat. *PLOS Pathogens*  
630 18:e1010149.
- 631 11. Cho Y, Ohm RA, Grigoriev IV, Srivastava A. 2013. Fungal-specific transcription factor  
632 *AbPf2* activates pathogenicity in *Alternaria brassicicola*. *The Plant J* 75:498–514.
- 633 12. Rybak K, See PT, Phan HTT, Syme RA, Moffat CS, Oliver RP, Tan K-C. 2017. A  
634 functionally conserved Zn<sub>2</sub>Cys<sub>6</sub> binuclear cluster transcription factor class regulates  
635 necrotrophic effector gene expression and host-specific virulence of two major  
636 Pleosporales fungal pathogens of wheat. *Mol Plant Pathol* 18:420–434.
- 637 13. Jones DAB, John E, Rybak K, Phan HTT, Singh KB, Lin S-Y, Solomon PS, Oliver RP,  
638 Tan K-C. 2019. A specific fungal transcription factor controls effector gene expression  
639 and orchestrates the establishment of the necrotrophic pathogen lifestyle on wheat. 1.  
640 *Sci Rep* 9:1–13.
- 641 14. Clairet C, Gay EJ, Porquier A, Blaise F, Marais CL, Balesdent M-H, Rouxel T, Soyer  
642 JL, Fudal I. 2021. Regulation of effector gene expression as concerted waves in  
643 *Leptosphaeria maculans*: a two-players game. *BioRxiv* 2021.12.15.472773.

- 644 15. John E, Singh KB, Oliver RP, Tan K-C. 2021. Transcription factor lineages in plant-  
645 pathogenic fungi, connecting diversity with fungal virulence. *Fungal Genetics and*  
646 *Biology* In press.
- 647 16. Chung H, Choi J, Park S-Y, Jeon J, Lee Y-H. 2013. Two conidiation-related  
648 Zn(II)2Cys6 transcription factor genes in the rice blast fungus. *Fungal Genet Biol*  
649 61:133–141.
- 650 17. Oh M, Son H, Choi GJ, Lee C, Kim J-C, Kim H, Lee Y-W. 2016. Transcription factor  
651 ART1 mediates starch hydrolysis and mycotoxin production in *Fusarium graminearum*  
652 and *F. verticillioides*. *Mol Plant Pathol* 17:755–768.
- 653 18. Habig M, Bahena-Garrido SM, Barkmann F, Haueisen J, Stukenbrock EH. 2020. The  
654 transcription factor Zt107320 affects the dimorphic switch, growth and virulence of the  
655 fungal wheat pathogen *Zymoseptoria tritici*. *Mol Plant Pathol* 21:124–138.
- 656 19. Han JW, Kim DY, Lee YJ, Choi YR, Kim B, Choi GJ, Han S-W, Kim H. 2020.  
657 Transcription factor PdeR is involved in fungal development, metabolic change, and  
658 pathogenesis of gray mold *Botrytis cinerea*. *J Agric Food Chem* 68:9171–9179.
- 659 20. Nitta M, Furukawa T, Shida Y, Mori K, Kuhara S, Morikawa Y, Ogasawara W. 2012. A  
660 new Zn(II)2Cys6-type transcription factor BgIR regulates  $\beta$ -glucosidase expression in  
661 *Trichoderma reesei*. *Fungal Genet Biol* 49:388–397.
- 662 21. Xiong Y, Wu VW, Lubbe A, Qin L, Deng S, Kennedy M, Bauer D, Singan VR, Barry K,  
663 Northen TR, Grigoriev IV, Glass NL. 2017. A fungal transcription factor essential for  
664 starch degradation affects integration of carbon and nitrogen metabolism. *PLOS*  
665 *Genetics* 13:e1006737.
- 666 22. Wu VW, Thieme N, Huberman LB, Dietschmann A, Kowbel DJ, Lee J, Calhoun S,  
667 Singan VR, Lipzen A, Xiong Y, Monti R, Blow MJ, O'Malley RC, Grigoriev IV, Benz JP,

- 668 Glass NL. 2020. The regulatory and transcriptional landscape associated with carbon  
669 utilization in a filamentous fungus. PNAS 117:6003–6013.
- 670 23. Gabriel R, Thieme N, Liu Q, Li F, Meyer LT, Harth S, Jecmenica M, Ramamurthy M,  
671 Gorman J, Simmons BA, McCluskey K, Baker SE, Tian C, Schuerg T, Singer SW,  
672 Fleißner A, Benz JP. 2021. The F-box protein gene *exo-1* is a target for reverse  
673 engineering enzyme hypersecretion in filamentous fungi. Proc Natl Acad Sci U S A  
674 118:e2025689118.
- 675 24. Li J, Liu Q, Li J, Lin L, Li X, Zhang Y, Tian C. 2021. RCO-3 and COL-26 form an  
676 external-to-internal module that regulates the dual-affinity glucose transport system in  
677 *Neurospora crassa*. Biotechnology for Biofuels 14:33.
- 678 25. Hane JK, Paxman J, Jones DAB, Oliver RP, de Wit P. 2020. “CATASrophy,” a  
679 genome-informed trophic classification of filamentous plant pathogens – how many  
680 different types of filamentous plant pathogens are there? Front Microbiol 10.
- 681 26. MacPherson S, Laroche M, Turcotte B. 2006. A fungal family of transcriptional  
682 regulators: the zinc cluster proteins. Microbiol Mol Biol Rev 70:583–604.
- 683 27. Schubert S, Popp C, Rogers PD, Morschhäuser J. 2011. Functional dissection of a  
684 *Candida albicans* zinc cluster transcription factor, the multidrug resistance regulator  
685 Mrr1. Eukaryotic Cell 10:1110–1121.
- 686 28. Erdős G, Dosztányi Z. 2020. Analyzing Protein Disorder with IUPred2A. Current  
687 Protocols in Bioinformatics 70:e99.
- 688 29. Zhang Y, Liu T, Meyer CA, Eeckhoutte J, Johnson DS, Bernstein BE, Nusbaum C,  
689 Myers RM, Brown M, Li W, Liu XS. 2008. Model-based Analysis of ChIP-Seq (MACS).  
690 Genome Biology 9:R137.

- 691 30. Ipcho SVS, Hane JK, Antoni EA, Ahren D, Henrissat B, Friesen TL, Solomon PS, Oliver  
692 RP. 2012. Transcriptome analysis of *Stagonospora nodorum*: gene models, effectors,  
693 metabolism and pantothenate dispensability. *Mol Plant Pathol* 13:531–545.
- 694 31. Siggers T, Duyzend MH, Reddy J, Khan S, Bulyk ML. 2011. Non-DNA-binding  
695 cofactors enhance DNA-binding specificity of a transcriptional regulatory complex. *Mol*  
696 *Syst Biol* 7:555.
- 697 32. Kojima T, Kunitake E, Ihara K, Kobayashi T, Nakano H. 2016. A robust analytical  
698 pipeline for genome-wide identification of the genes regulated by a transcription factor:  
699 combinatorial analysis performed using gSELEX-Seq and RNA-Seq. *PLOS ONE*  
700 11:e0159011.
- 701 33. Zhao C, Waalwijk C, de Wit PJGM, van der Lee T, Tang D. 2011. EBR1, a novel  
702 Zn(2)Cys(6) transcription factor, affects virulence and apical dominance of the hyphal  
703 tip in *Fusarium graminearum*. *Mol Plant Microbe Interact* 24:1407–1418.
- 704 34. Jonkers W, Xayamongkhon H, Haas M, Olivain C, van der Does HC, Broz K, Rep M,  
705 Alabouvette C, Steinberg C, Kistler HC. 2014. *EBR1* genomic expansion and its role in  
706 virulence of *Fusarium* species. *Environ Microbiol* 16:1982–2003.
- 707 35. Adnan M, Zheng W, Islam W, Arif M, Abubakar YS, Wang Z, Lu G. 2017. Carbon  
708 catabolite repression in filamentous fungi. *Int J Mol Sci* 19:48.
- 709 36. John E, Singh KB, Oliver RP, Tan K-C. 2021. Transcription factor control of virulence in  
710 phytopathogenic fungi. *Mol Plant Pathol* 22:858–881.
- 711 37. Gomi K. 2019. Regulatory mechanisms for amylolytic gene expression in the koji mold  
712 *Aspergillus oryzae*. *Bioscience, Biotechnology, and Biochemistry* 83:1385–1401.



- 713 38. Wang P, Kojima T, Kobayashi T, Nakano H. 2012. Comprehensive analysis of the  
714 DNA-binding specificity of an *Aspergillus nidulans* transcription factor, AmyR, using a  
715 bead display system. *Biosci Biotechnol Biochem* 76:1128–1134.
- 716 39. Tani S, Katsuyama Y, Hayashi T, Suzuki H, Kato M, Gomi K, Kobayashi T, Tsukagoshi  
717 N. 2001. Characterization of the *amyR* gene encoding a transcriptional activator for the  
718 amylase genes in *Aspergillus nidulans*. *Curr Genet* 39:10–15.
- 719 40. Nakamura T, Maeda Y, Tanque N, Makita T, Kato M, Kobayashi T. 2006. Expression  
720 profile of amylolytic genes in *Aspergillus nidulans*. *Bioscience, Biotechnology, and*  
721 *Biochemistry* 70:2363–2370.
- 722 41. Marín-Menguiano M, Moreno-Sánchez I, Barrales RR, Fernández-Álvarez A, Ibeas JI.  
723 2019. N-glycosylation of the protein disulfide isomerase Pdi1 ensures full *Ustilago*  
724 *maydis* virulence. *PLOS Pathogens* 15:e1007687.
- 725 42. Lin S-Y, Chooi Y-H, Solomon PS. 2018. The global regulator of pathogenesis PnCon7  
726 positively regulates *Tox3* effector gene expression through direct interaction in the  
727 wheat pathogen *Parastagonospora nodorum*. *Molecular Microbiology* 109:78–90.
- 728 43. Craig JP, Coradetti ST, Starr TL, Glass NL. 2015. Direct target network of the  
729 *Neurospora crassa* plant cell wall deconstruction regulators CLR-1, CLR-2, and XLR-1.  
730 *mBio* 6.
- 731 44. IpCho SVS, Tan K-C, Koh G, Gummer J, Oliver RP, Trengove RD, Solomon PS. 2010.  
732 The transcription factor StuA regulates central carbon metabolism, mycotoxin  
733 production, and effector gene expression in the wheat pathogen *Stagonospora*  
734 *nodorum*. *Eukaryotic Cell* 9:1100–1108.
- 735 45. Chooi Y-H, Zhang G, Hu J, Muria-Gonzalez MJ, Tran PN, Pettitt A, Maier AG, Barrow  
736 RA, Solomon PS. 2017. Functional genomics-guided discovery of a light-activated

- 737           phytoxin in the wheat pathogen *Parastagonospora nodorum* via pathway activation.  
738           Environ Microbiol 19:1975–1986.
- 739   46.   Slattery M, Zhou T, Yang L, Dantas Machado AC, Gordân R, Rohs R. 2014. Absence  
740           of a simple code: how transcription factors read the genome. Trends in Biochemical  
741           Sciences 39:381–399.
- 742   47.   Reiter F, Wienerroither S, Stark A. 2017. Combinatorial function of transcription factors  
743           and cofactors. Current Opinion in Genetics & Development 43:73–81.
- 744   48.   Carey MF, Peterson CL, Smale ST. 2012. Confirming the Functional Importance of a  
745           Protein–DNA Interaction. Cold Spring Harb Protoc 2012:pdb.top070060.
- 746   49.   Spivakov M. 2014. Spurious transcription factor binding: non-functional or genetically  
747           redundant? Bioessays 36:798–806.
- 748   50.   Osterwalder M, Barozzi I, Tissières V, Fukuda-Yuzawa Y, Mannion BJ, Afzal SY, Lee  
749           EA, Zhu Y, Plajzer-Frick I, Pickle CS, Kato M, Garvin TH, Pham QT, Harrington AN,  
750           Akiyama JA, Afzal V, Lopez-Rios J, Dickel DE, Visel A, Pennacchio LA. 2018.  
751           Enhancer redundancy allows for phenotypic robustness in mammalian development.  
752           Nature 554:239–243.
- 753   51.   Soyer JL, Ghalid ME, Glaser N, Ollivier B, Linglin J, Grandaubert J, Balesdent M-H,  
754           Connolly LR, Freitag M, Rouxel T, Fudal I. 2014. Epigenetic control of effector gene  
755           expression in the plant pathogenic fungus *Leptosphaeria maculans*. PLOS Genetics  
756           10:e1004227.
- 757   52.   Soyer JL, Möller M, Schotanus K, Connolly LR, Galazka JM, Freitag M, Stukenbrock  
758           EH. 2015. Chromatin analyses of *Zymoseptoria tritici*: methods for chromatin  
759           immunoprecipitation followed by high-throughput sequencing (ChIP-seq). Fungal Genet  
760           Biol 79:63–70.

- 761 53. Bewick AJ, Hofmeister BT, Powers RA, Mondo SJ, Grigoriev IV, James TY, Stajich JE,  
762 Schmitz RJ. 2019. Diversity of cytosine methylation across the fungal tree of life. 3.  
763 Nature Ecology & Evolution 3:479–490.
- 764 54. Syme RA, Tan K-C, Hane JK, Dodhia K, Stoll T, Hastie M, Furuki E, Ellwood SR,  
765 Williams AH, Tan Y-F, Testa AC, Gorman JJ, Oliver RP. 2016. Comprehensive  
766 annotation of the *Parastagonospora nodorum* reference genome using next-generation  
767 genomics, transcriptomics and proteogenomics. PLOS ONE 11:e0147221.
- 768 55. Blum M, Chang H-Y, Chuguransky S, Grego T, Kandasaamy S, Mitchell A, Nuka G,  
769 Paysan-Lafosse T, Qureshi M, Raj S, Richardson L, Salazar GA, Williams L, Bork P,  
770 Bridge A, Gough J, Haft DH, Letunic I, Marchler-Bauer A, Mi H, Natale DA, Necci M,  
771 Orengo CA, Pandurangan AP, Rivoire C, Sigrist CJA, Sillitoe I, Thanki N, Thomas PD,  
772 Tosatto SCE, Wu CH, Bateman A, Finn RD. 2020. The InterPro protein families and  
773 domains database: 20 years on. Nucleic Acids Res  
774 <https://doi.org/10.1093/nar/gkaa977>.
- 775 56. Nguyen Ba AN, Pogoutse A, Provart N, Moses AM. 2009. NLStradamus: a simple  
776 Hidden Markov Model for nuclear localization signal prediction. BMC Bioinformatics  
777 10:202.
- 778 57. Andrews S. 2010. Babraham Bioinformatics - FastQC a quality control tool for high  
779 throughput sequence data. <https://www.bioinformatics.babraham.ac.uk/projects/fastqc/>.  
780 Retrieved 26 April 2021.
- 781 58. Martin M. 2011. Cutadapt removes adapter sequences from high-throughput  
782 sequencing reads. 1. EMBnet.journal 17:10–12.
- 783 59. Bushnell B. 2016. BBMap. SourceForge. <https://sourceforge.net/projects/bbmap/>.  
784 Retrieved 26 April 2021.

- 785 60. Li H. 2013. Aligning sequence reads, clone sequences and assembly contigs with  
786 BWA-MEM. arXiv:13033997 [q-bio].
- 787 61. Li H, Handsaker B, Wysoker A, Fennell T, Ruan J, Homer N, Marth G, Abecasis G,  
788 Durbin R, 1000 Genome Project Data Processing Subgroup. 2009. The sequence  
789 alignment/map format and SAMtools. *Bioinformatics* 25:2078–2079.
- 790 62. Feng J, Liu T, Qin B, Zhang Y, Liu XS. 2012. Identifying ChIP-seq enrichment using  
791 MACS. 9. *Nat Protoc* 7:1728–1740.
- 792 63. Gaspar JM. 2018. Improved peak-calling with MACS2. bioRxiv 496521.
- 793 64. Ramírez F, Ryan DP, Grüning B, Bhardwaj V, Kilpert F, Richter AS, Heyne S, Dündar  
794 F, Manke T. 2016. deepTools2: a next generation web server for deep-sequencing data  
795 analysis. *Nucleic Acids Res* 44:W160–W165.
- 796 65. Shao Z, Zhang Y, Yuan G-C, Orkin SH, Waxman DJ. 2012. MAnorm: a robust model  
797 for quantitative comparison of ChIP-Seq data sets. *Genome Biology* 13:R16.
- 798 66. Bailey TL, Boden M, Buske FA, Frith M, Grant CE, Clementi L, Ren J, Li WW, Noble  
799 WS. 2009. MEME SUITE: tools for motif discovery and searching. *Nucleic Acids Res*  
800 37:W202-208.
- 801 67. Bailey TL, Elkan C. 1994. Fitting a mixture model by expectation maximization to  
802 discover motifs in biopolymers. *Proc Int Conf Intell Syst Mol Biol* 2:28–36.
- 803 68. Bailey TL, Machanick P. 2012. Inferring direct DNA binding from ChIP-seq. *Nucleic*  
804 *Acids Res* 40:e128–e128.
- 805 69. Grant CE, Bailey TL, Noble WS. 2011. FIMO: scanning for occurrences of a given  
806 motif. *Bioinformatics* 27:1017–1018.

- 807 70. Armstrong RA. 2014. When to use the Bonferroni correction. *Ophthalmic Physiol Opt*  
808 34:502–508.
- 809 71. Yu G, Wang L-G, He Q-Y. 2015. CHIPseeker: an R/Bioconductor package for ChIP  
810 peak annotation, comparison and visualization. *Bioinformatics* 31:2382–2383.
- 811 72. Lin X, Tirichine L, Bowler C. 2012. Protocol: Chromatin immunoprecipitation (ChIP)  
812 methodology to investigate histone modifications in two model diatom species. *Plant*  
813 *Methods* 8:48.
- 814 73. Bursteinas B, Britto R, Bely B, Auchincloss A, Rivoire C, Redaschi N, O'Donovan C,  
815 Martin MJ. 2016. Minimizing proteome redundancy in the UniProt Knowledgebase.  
816 *Database : J Biol Databases Curation* 2016.
- 817 74. Yu G, Wang L-G, Han Y, He Q-Y. 2012. clusterProfiler: an R package for comparing  
818 biological themes among gene clusters. *OMICS: A Journal of Integrative Biology*  
819 16:284–287.

820

821

822 **7. Tables**

823 **Table 1.** Rationale for the investigation of novel transcription factors (TFs) in this study

| TF investigated               | Involvement                                                                                 | Virulence-associated orthologues <sup>A</sup>                                                                       |
|-------------------------------|---------------------------------------------------------------------------------------------|---------------------------------------------------------------------------------------------------------------------|
| <i>PnPro1</i><br>(SNOG_3490)  | Directly-positively regulated by PnPf2                                                      | <i>AbPro1</i> ( <i>Ab</i> ), <i>MoPRO1</i> ( <i>Mo</i> ), <i>GzZC232</i> ( <i>Fg</i> ), <i>UvPro1</i> ( <i>Uv</i> ) |
| <i>PnAda1</i><br>(SNOG_04486) | Directly-positively regulated by PnPf2                                                      | <i>GzbZIP001</i> ( <i>Fg</i> ), <i>FpAda1</i> ( <i>Fp</i> )                                                         |
| SNOG_08237                    | Directly-positively regulated by PnPf2                                                      | <i>CoHox1</i> ( <i>Co</i> )                                                                                         |
| SNOG_08565                    | Shared ancestral lineage with PnPf2 orthologues                                             | -                                                                                                                   |
| <i>PnEbr1</i><br>(SNOG_03067) | Co-expressed with <i>PnPf2</i> , <i>ToxA</i> , <i>Tox1</i> and <i>Tox3</i> during infection | <i>EBR1</i> ( <i>Fg</i> ), <i>EBR1</i> ( <i>Fo</i> ), <i>MoCod2</i> and <i>Cnf2</i> ( <i>Mo</i> )                   |
| <i>PnCreA</i><br>(SNOG_13619) | Enriched CreA-binding motif (22) in PnPf2-regulated gene promoters                          | <i>CreA</i> ( <i>Af</i> ), <i>Cre1</i> ( <i>Fo</i> ), <i>CreA</i> ( <i>Pe</i> )                                     |

824 <sup>A</sup> Putative orthologues were inferred by cross-referencing a previous TF-orthology analysis  
825 and literature review (15, 36). Abbreviations: *Ab*; *Alternaria brassicicola*, *Af*; *Aspergillus*  
826 *flavus*, *Co*; *Colletotrichum orbiculare*, *Fg*; *Fusarium graminearum*, *Fo*; *Fusarium oxysporum*,  
827 *Fp*; *Fusarium pseudograminearum*, *Mo*; *Magnaporthe oryzae*, *Pe*; *Penicillium expansum*.

828

829

830 **Table 2.** Overview of the strains referenced in this study <sup>A</sup>

| <b>Strain ID</b>   | <b>Description<sup>B</sup></b>                                                   |
|--------------------|----------------------------------------------------------------------------------|
| SN15               | Wildtype <i>P. nodorum</i> reference isolate                                     |
| <i>pf2ko</i>       | Original <i>PnPf2</i> deletion mutant<br>(12, 13)                                |
| <i>pf2_KO</i>      | <i>PnPf2</i> deletion mutant to facilitate targeted complementation              |
| <i>Pf2_OE</i>      | <i>PnPf2</i> overexpression ( <i>pGpdA</i> promoter)                             |
| <i>Pf2-GFP</i>     | <i>PnPf2</i> with <i>GFP</i> tag, native promoter                                |
| <i>Pf2-GFP_OE</i>  | <i>PnPf2</i> with <i>GFP</i> tag, overexpression promoter                        |
| <i>Pf2-HA</i>      | <i>PnPf2</i> with 3xHA tag, native promoter                                      |
| <i>Pf2-HA_OE</i>   | <i>PnPf2</i> with 3xHA tag, overexpression promoter                              |
| <i>pf2-HA_KO</i>   | <i>PnPf2</i> coding sequence replaced with 3xHA tag                              |
| <i>CreA_OE</i>     | <i>PnCreA</i> overexpression ( <i>pGpdA</i> promoter)                            |
| <i>creA_KO</i>     | <i>PnCreA</i> deletion mutant                                                    |
| <i>CreA_Ec</i>     | <i>PnCreA</i> ectopically-integrated construct                                   |
| SN15-GFP           | SN15 constitutively expressing <i>GFP</i>                                        |
| <i>pTef1-dTom</i>  | SN15 constitutively expressing <i>dTomato</i> (defined locus)                    |
| <i>p15417_M1M2</i> | SN15 expressing <i>dTomato</i> (defined locus) SNOG_15417 promoter, no mutations |
| <i>p15417_m1M2</i> | SN15 expressing <i>dTomato</i> (defined locus) SNOG_15417 promoter, M1 mutated   |
| <i>p15417_M1m2</i> | SN15 expressing <i>dTomato</i> (defined locus) SNOG_15417 promoter, M2 mutated   |
| <i>p15417_m1m2</i> | SN15 expressing <i>dTomato</i> (defined locus) SNOG_15417 promoter, M1+2 mutated |
| <i>pro1_KO</i>     | <i>PnPro1</i> deletion mutant                                                    |
| <i>Pro1_comp</i>   | <i>PnPro1</i> complemented in <i>pro1_KO</i> background                          |
| <i>ada1_KO</i>     | <i>PnAda1</i> deletion mutant                                                    |
| <i>Ada1_comp</i>   | <i>PnAda1</i> complemented in <i>ada1_KO</i> background                          |
| <i>08237_KO</i>    | SNOG_08237 deletion mutant                                                       |
| <i>08237_comp</i>  | SNOG_08237 complemented in <i>08237_KO</i> background                            |
| <i>08565_KO</i>    | SNOG_08565 deletion mutant                                                       |
| <i>08565_comp</i>  | SNOG_08565 complemented in <i>08565_KO</i> background                            |
| <i>ebr1_KO</i>     | <i>PnEbr1</i> deletion mutant                                                    |
| <i>Ebr1_Ec</i>     | <i>PnEbr1</i> ectopically-integrated construct                                   |

831 <sup>A</sup> Strains are listed in corresponding order to the detailed description of their generation in  
832 Text S3.

833 <sup>B</sup> Abbreviations: GFP – Green fluorescent protein, HA – Haemagglutinin, M1 – Motif1, M2 –  
834 Motif 2.

835

836 **8. Figures**

837

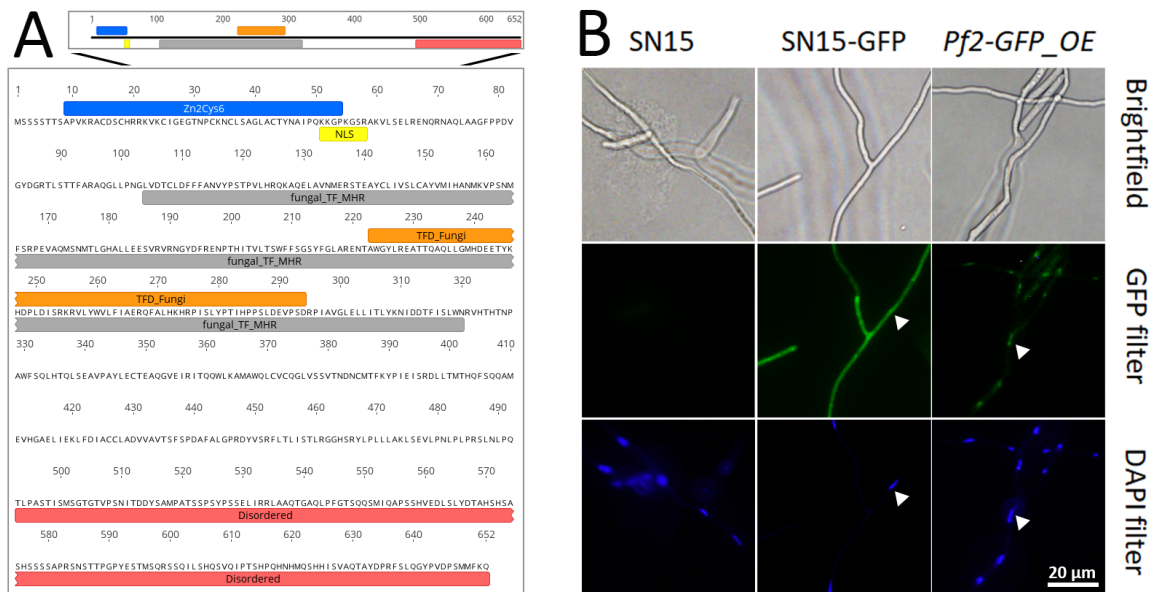

838

839 **Fig. 1** PnPf2 domain analysis and cellular localisation. A) Predicted domains and  
 840 features identified in the 652 amino acid PnPf2 protein sequence typical of a Zn<sub>2</sub>Cys<sub>6</sub>  
 841 transcription factor (TF). The region corresponding to the N-terminal Zn<sub>2</sub>Cys<sub>6</sub> DNA  
 842 binding domain (Zn<sub>2</sub>Cys<sub>6</sub> - Interpro IPR001138) is depicted in blue and the nuclear  
 843 localisation signal (NLS) is in yellow. The fungal transcription factor domain  
 844 (TFD\_fungi - Interpro IPR007219) corresponds to orange within the ‘middle homology  
 845 region’ (fungal\_TF\_MHR - Conserved Domain Database CD12148) depicted in grey.  
 846 A C-terminal disordered protein region lacking secondary structure was identified that  
 847 corresponds to the red bar. B) Epifluorescence microscopy depicting nuclear  
 848 localisation of the GFP-tagged PnPf2 translational fusion specific to the *Pf2-GFP\_OE*  
 849 overexpression strain, in contrast to the wildtype (SN15) and the positive control strain  
 850 expressing cytoplasmic GFP (SN15-GFP). Arrows indicate the corresponding  
 851 locations of fungal nuclei under the respective filters determined by DAPI staining of a  
 852 germinated pycnidiospore. A fluorescence signal was not detected in the *Pf2-GFP*



853 strain, where expression was driven by the native *PnPf2* promoter, indicating PnPf2

854 accumulates at relatively low abundance.

855

856

857

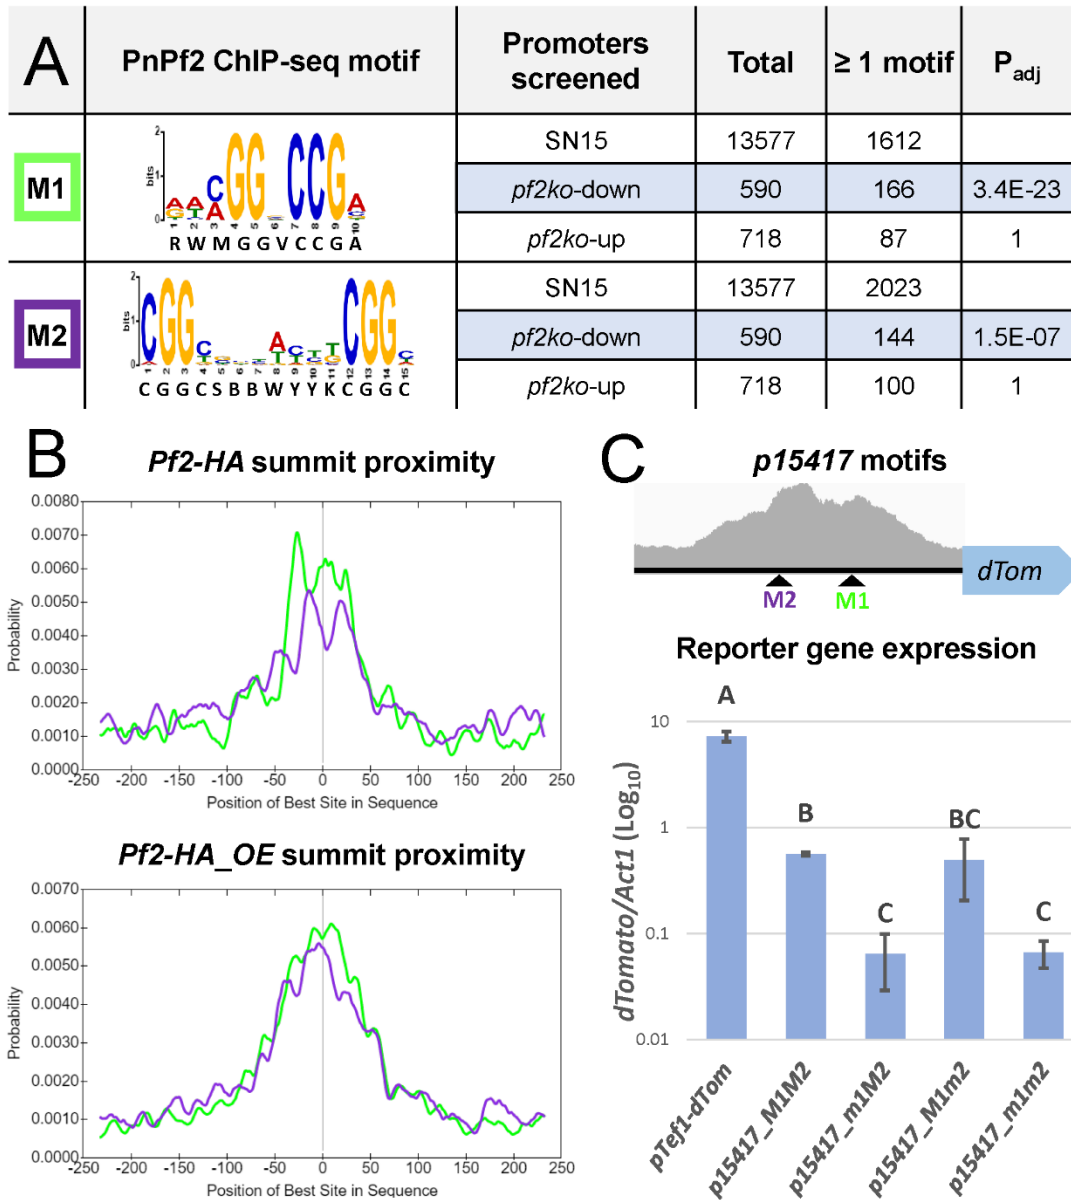

858

859 **Fig. 2** Identification of PnPf2 regulatory element motifs. **A**) The M1 motif (5'-  
 860 RWMGGVCCGA-3') and M2 motif (5'-CGGCSBBWYYKCGGC-3') were modelled  
 861 from the merged set of *Pf2*-HA and *Pf2*-HA\_OE sample ChIP-seq peak regions. Their  
 862 detection ( $\geq 1$  occurrence) in the promoters of PnPf2 positively (*pf2ko-down*) or  
 863 negatively (*pf2ko-up*) regulated gene promoters (13) are indicated relative to all SN15  
 864 promoters. The P<sub>adj</sub> value reflects the test for significant enrichment (Fisher's test with  
 865 Bonferroni P<sub>adj</sub> < 0.01), where both motifs were enriched in the *pf2ko-down* genes  
 866 relative to SN15. **B**) The position of motif occurrences relative to ChIP-seq summits,

867 demonstrating their higher likelihood at close proximity to the best estimate of PnPf2-  
868 DNA binding loci. **C)** Gene expression analysis assessing the effect of M1 and M2  
869 motif mutation in *P. nodorum in situ*. The motif loci within a ChIP-seq peak in the  
870 SNOG\_15417 gene promoter region (*p15417*) are depicted. The *dTomato* reporter  
871 gene was fused to a constitutive promoter control (*pTef1-dTom*) or the SNOG\_15417  
872 gene promoter (*p15417\_M1M2*) in the *P. nodorum* background. The motifs were also  
873 mutated through substitution of the respective 'CGG' triplets, alone or in combination  
874 (*p15417\_m1M2*, *p15417\_M1m2* and *p15417\_m1m2*). The strains *p15417\_m1M2* and  
875 *p15417\_m1m2* where M1 had been mutated exhibited significantly reduced  
876 expression relative to the non-mutated promoter in *p15417\_M1M2*. This suggested  
877 PnPf2 regulatory activity had been impaired following M1 mutation but not M2 mutation  
878 in *p15417*. Letters indicate statistically distinct groupings by ANOVA with Tukey's-HSD  
879 ( $P < 0.05$ ).  
880

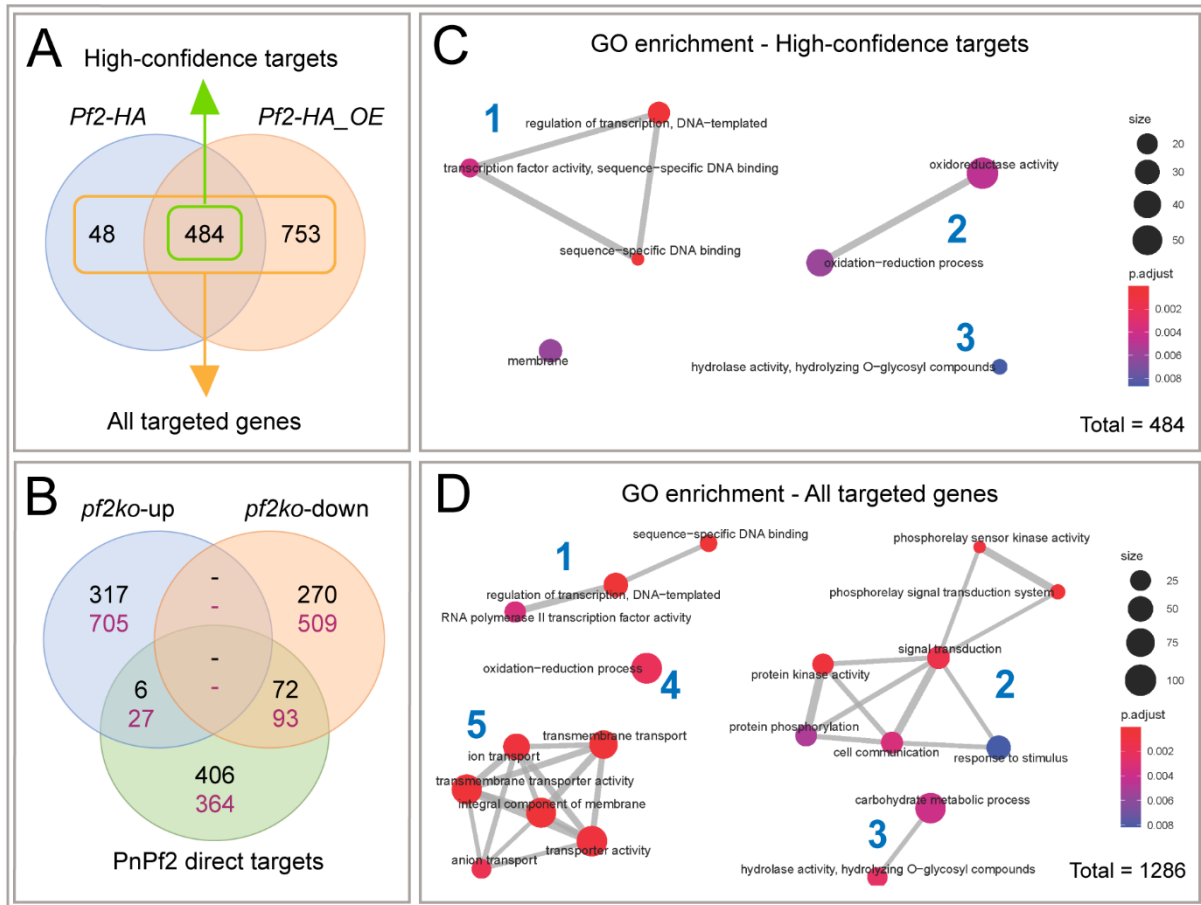

881

882 **Fig. 3** Gene expression and gene-ontology (GO) analysis of PnPf2 direct targets. **A)**

883 Overview of the genes targeted by PnPf2 in their promoter region based on the

884 respective *Pf2-HA* and *Pf2-HA\_OE* ChIP-seq datasets. There were 484 genes

885 considered high-confidence PnPf2 targets among the 1286 putative targets from either

886 construct. **B)** The high-confidence targets in comparison with their expression pattern

887 in the *pf2ko* deletion mutant. Black numbers correspond to the *in vitro* growth

888 conditions replicated for ChIP-seq sample preparation while purple numbers also

889 encompass differentially expressed genes during early infection. The greater overlap

890 with PnPf2 positively-regulated (*pf2ko*-down - 72 genes) than repressed (*pf2ko*-up - 6

891 genes) suggested PnPf2 predominantly functions as a positive regulator of gene

892 expression. **C-D)** A summary of significantly-enriched GO terms among PnPf2-

893 targeted genes. The high-confidence (*Pf2-HA* and *Pf2-HA\_OE*) and total identified

894 targets (*Pf2-HA* or *Pf2-HA\_OE*) are both displayed for comparison. Bubble sizes are  
895 proportionate to gene counts, colours to the enrichment test *P* values and the lines  
896 between bubbles to the total shared terms. Numbers in blue indicate connected gene  
897 networks representing transcription factors [number 1], redox molecules [2],  
898 carbohydrate-active enzymes [3], cell-signalling molecules [4], and trans-membrane  
899 transporters [5].

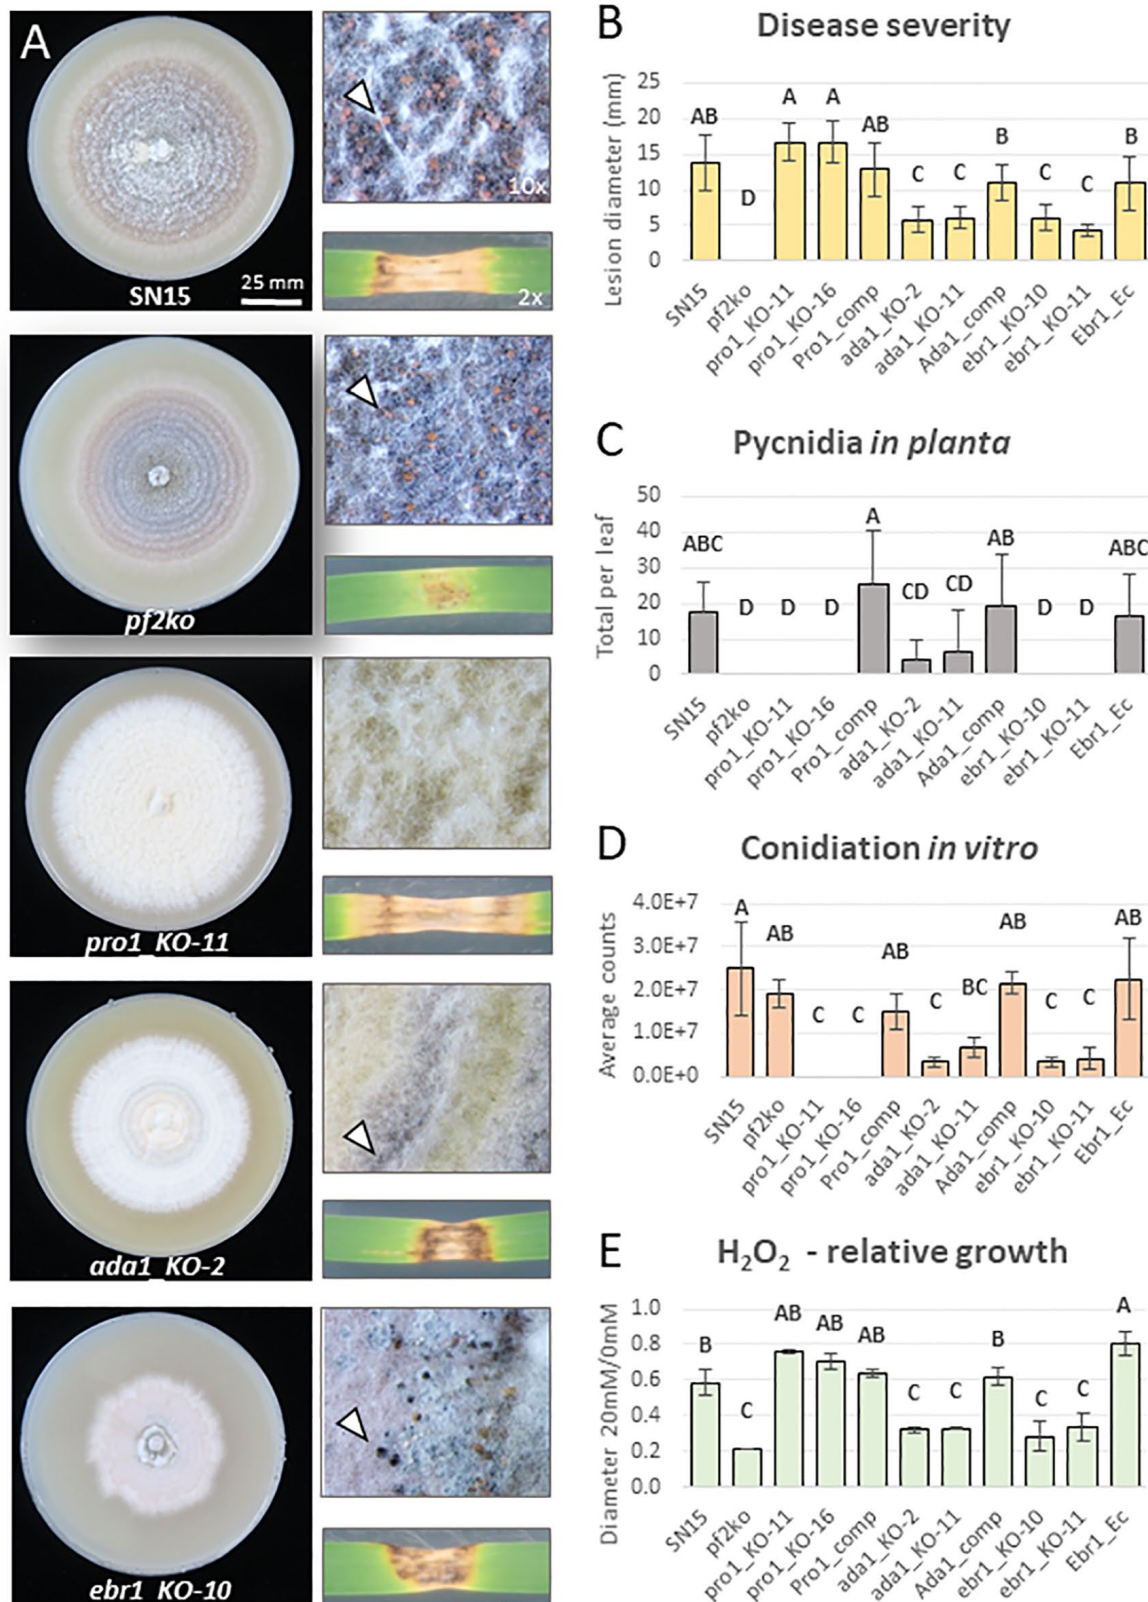

900

901

902 **Fig. 4** Phenotypic assessment of transcription factor (TF) gene deletion mutants. **A)**  
903 Representative images after 12 days of growth on nutrient-rich agar (V8PDA) and  
904 infection on detached wheat leaves (cv. Halberd). Arrows demonstrate pycnidia if they  
905 were detected in the respective mutants. **B)** Average lesion sizes representing disease  
906 severity. **C)** Pycnidia counts, a measure of pathogenic fitness following the infection.  
907 **D)** Average conidial (pycnidiospore) counts on V8PDA. **E)** Growth inhibition on 20mM  
908 H<sub>2</sub>O<sub>2</sub> relative to 0mM on minimal medium agar. Letters indicate statistically distinct  
909 groupings by ANOVA with Tukey's-HSD (P<0.05).  
910

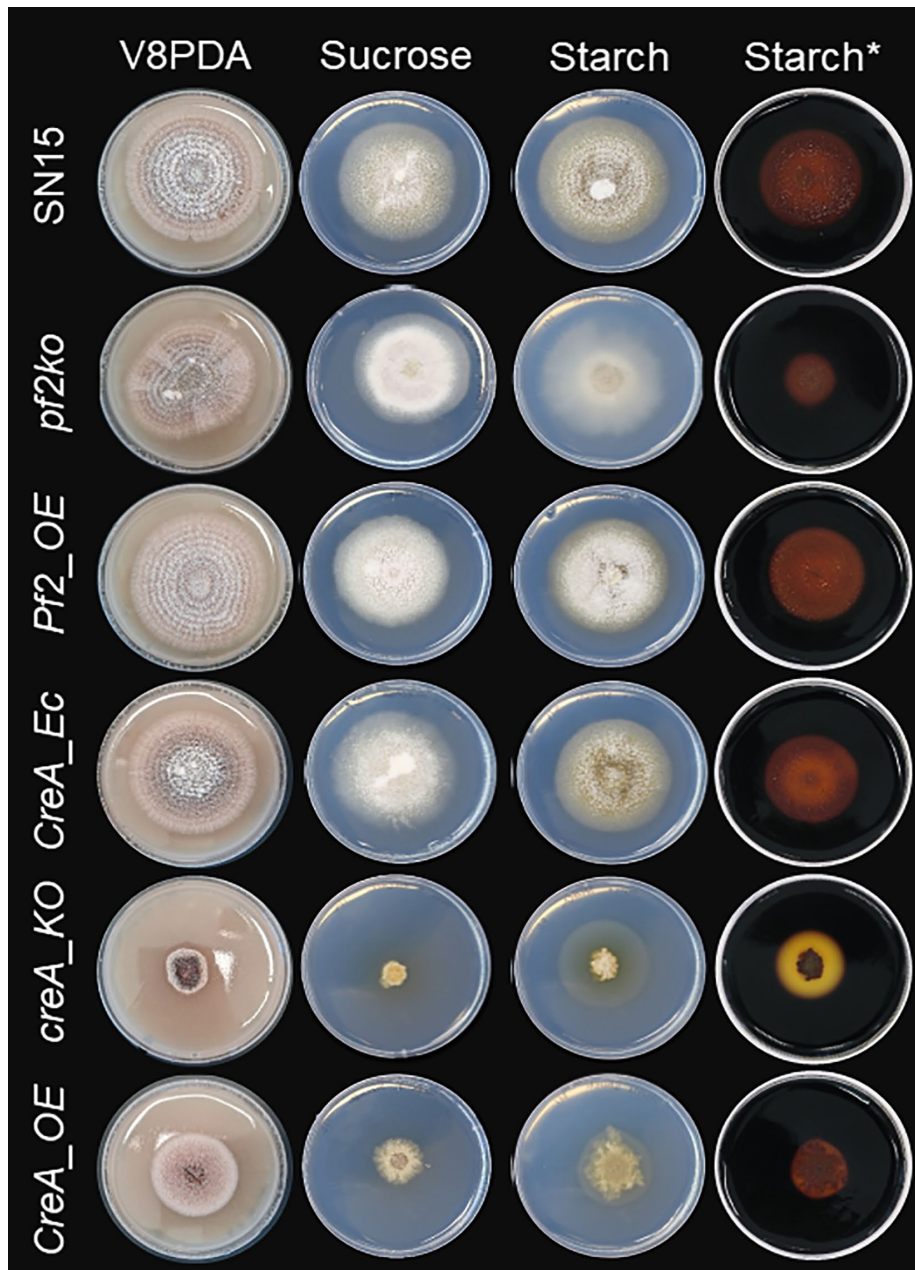

911

912 **Fig. 5** Assessment of *PnPf2* and *PnCreA* mutant growth on different substrates.

913 Images following 12 days of growth on nutrient-rich V8PDA and minimal-medium agar

914 with a primary (sucrose) or secondary (starch) carbon source. Wildtype SN15 and the

915 respective mutants are listed on each row. The capacity to fully utilise starch was

916 enhanced in the *creA\_KO* mutant despite growth defects, suggesting impaired carbon-

917 catabolite repression. Starch utilisation was moderately reduced in the *pf2ko* mutant.

918 \*Post-stained with Lugol's iodine to assist visualisation of starch hydrolysis.

919



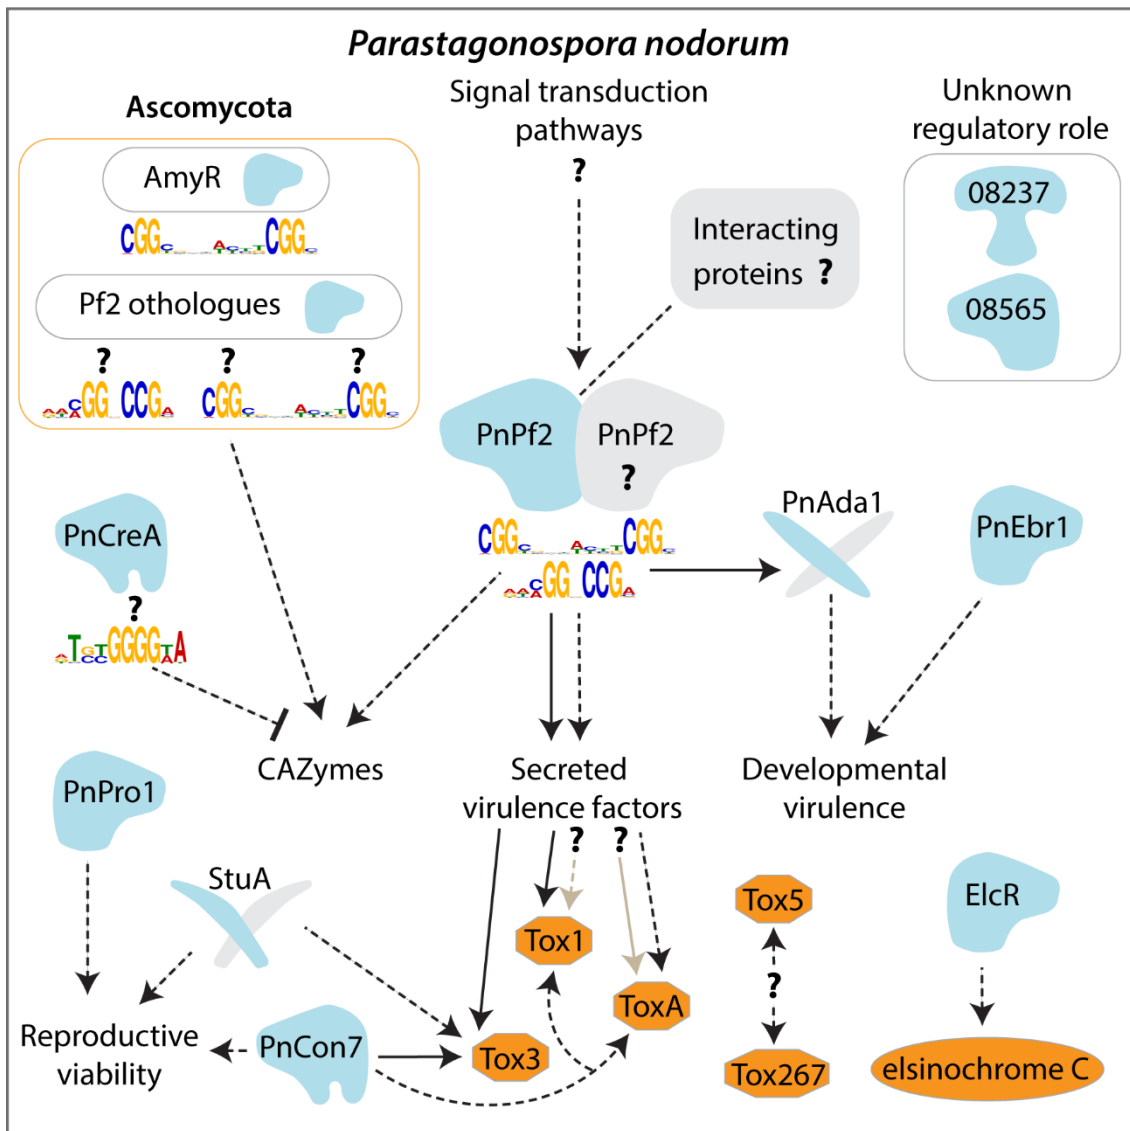

920

921 **Fig. 6** The proposed model of the PnPf2-centred regulatory network in the virulence

922 of *P. nodorum*. The Pf2 taxonomic orthologues and AmyR regulators in the

923 Ascomycota fungi (discussed in the main text) are presented for context regarding

924 the two PnPf2 regulatory motifs described in this study. Transcription factors (TFs)

925 and virulence factors that are cloned and characterised in *P. nodorum* are depicted

926 (blue and orange shapes respectively; grey shapes indicate putative interacting

927 proteins). Dashed arrows show where gene regulation occurs and solid arrows

928 represent direct regulation. Question marks are presented where evidence is

929 tentative and requires validation. PnPf2 controls the expression of key virulence

930 factors. The effector *Tox3* is directly regulated and *ToxA*, based on promoter-motif  
931 and gene expression data, is likely a direct target during plant infection. PnPf2 also  
932 directly targets the *Tox1* promoter as a possible enhancer while regulators of *Tox267*  
933 and *Tox5* require investigation. Carbohydrate-active enzymes (CAZymes) are also  
934 regulated by PnPf2, with a subset putatively repressed by PnCreA for which no  
935 distinct role in virulence has been established. Developmental virulence, such as  
936 oxidative stress tolerance and hyphal growth, were processes attributed in this study  
937 to the PnPf2 targets PnAda1 and PnEbr1. PnPro1 and StuA (44) are essential for  
938 reproduction by sporulation, while no distinct role was identified for the putative TFs  
939 encoded by SNOG\_08237 and SNOG\_08565. Elsewhere, PnCon7 has been  
940 reported to regulate effector expression but is an essential viability factor, while  
941 production of a phytotoxic metabolite elsinochrome C is controlled by the pathway-  
942 specific ElcR gene-cluster TF (45, 42).

943

944

## 945 9. Supplemental item legends

946 **Text S1** Chromatin immunoprecipitation (ChIP) strain assessment and  
947 overview of ChIP-seq/ChIP-qPCR.

948 **Text S2** Supplemental transcription factor mutant phenotype assessment.

949 **Text S3** Supplemental materials and methods.

950 **Fig. S1** A depiction of the PnPf2 targeting of characterised effector genes in *P.*  
951 *nodorum* SN15. The *Pf2-HA* and *Pf2-HA\_OE* ChIP-seq read peaks are presented at  
952 the *Tox3*, *Tox1*, *ToxA* and *Tox267* promoters. Peak summits were evident in the *Tox3*  
953 and *Tox1* promoters. Red dots represent instances of the M1 motif (5'-  
954 RWMGGVCCGA-3') and blue dots M2 (5'-CGGCSBBWYYKCGGC-3').

955 **Fig. S2** A heatmap depiction of *Parastagonospora nodorum* SN15 hierarchical  
956 cluster analysis. Clustering was based on microarray gene-expression data during  
957 infection (*in planta*) or axenic (*in vitro*) growth obtained from a previous study (30).  
958 Clusters were cut into the 10 most distant clusters to identify genes co-expressed with  
959 *PnPf2*, *ToxA*, *Tox1* and *Tox3*, which included the Zn<sub>2</sub>Cys<sub>6</sub> transcription factor *PnEbr1*  
960 (SNOG\_03037) therefore investigated in this study.

961 **File S1** A spreadsheet detailing the genomic coordinates for ChIP-seq peak  
962 regions [columns A-D], the respective summit loci [E], the pileup height of the mapped  
963 reads [F] and the summit  $-\text{Log}_{10}(\text{Q-values})$  representing the difference of ChIP reads  
964 relative to the input control sample [G]. The *Pf2-HA* strain encompasses columns A-G  
965 and the *Pf2-HA\_OE* strain encompasses column H-N. Also included are the genomic  
966 coordinates for the peak regions obtained by merging the overlapping regions from  
967 the *Pf2-HA* and *Pf2-HA\_OE* samples using MAnorm (65) [O-S].

968 **File S2** A spreadsheet of PnPf2 regulation data across the *P. nodorum* SN15  
969 genome for the respective annotated genes [column A]. Listed are whether ChIP-seq

970 promoter summits were called from the *Pf2-HA* and *Pf2-HA\_OE* samples [B-C],  
971 whether the enriched PnPf2 target motifs [D-E] or the putative PnCreA motif [G] were  
972 present in the gene promoter regions, and whether the gene was also down-regulated  
973 in the *pf2ko* mutant [G]. Also listed are the functional annotations [G-M]; whether the  
974 gene was classed as effector-like [H], a TF [I], the associated GO IDs/terms [J-K] and  
975 Interpro domain information [L-M]. The final columns list the respective gene  
976 expression data for *pf2ko* compared with SN15 either *in vitro* (*iv*) or *in planta* (*ip*) [13-  
977 22]. \*Information indicated was derived from Jones et al. (2019) for comparative  
978 purposes.

979 **File S3** A spreadsheet compilation of the primers used in this study organised  
980 by their general use [column 1] with the primer ID and sequence [2-3] and descriptions  
981 for their use [4-5]. Highlighted in italics are restriction enzyme recognition sites, in bold  
982 are overlapping regions used in cloning and in red are sites for incorporating single  
983 nucleotide changes during cloning.

984

985
